# Supplementary material for: Dual function of coronatine as a bacterial virulence factor against plants: possible COI1–JAZ-independent role
Source: Royal Society of Chemistry journal article supplement (doi:10.1039/c5ra20676f), 2016-01-01

*Supporting Information for Egoshi, Takaoka, Saito, Nukadzuka, Hayashi, Ishimaru, Yamakoshi, Dodo, Sodeoka and Ueda; Dual function of coronatine as a bacterial virulence factor against plants: possible COI1-JAZ-independent role.*

**Dual function of coronatine as a bacterial virulence factor against plants: possible COI1-JAZ-independent role.**

Syusuke Egoshi<sup>1</sup>, Yousuke Takaoka<sup>1</sup>, Hiroaki Saito<sup>2</sup>, Yuuki Nukadzuka<sup>1</sup>, Kengo Hayashi<sup>1</sup>, Yasuhiro Ishimaru<sup>1</sup>, Hiroyuki Yamakoshi<sup>3</sup>, Kosuke Dodo<sup>3</sup>, Mikiko Sodeoka<sup>3</sup>, and Minoru Ueda<sup>1\*</sup>

1. Department of Chemistry, Tohoku University, 6-3 Aramaki-Aza-Aoba, Aoba-ku, Sendai 980-8578, Japan.
2. Institute of Science and Engineering, Kanazawa University, Kakuma, Kanazawa, Ishikawa, Japan.
3. Synthetic Organic Chemistry Laboratory, RIKEN, Saitama 351-0198, Japan.

Table of Contents:

|                                                |       |
|------------------------------------------------|-------|
| Figures S1-S5 and Table S1                     | SI 2  |
| Schemes S1 and S2                              | SI 8  |
| Materials and Methods                          | SI 10 |
| <sup>1</sup> H and <sup>13</sup> C NMR Spectra | SI 25 |

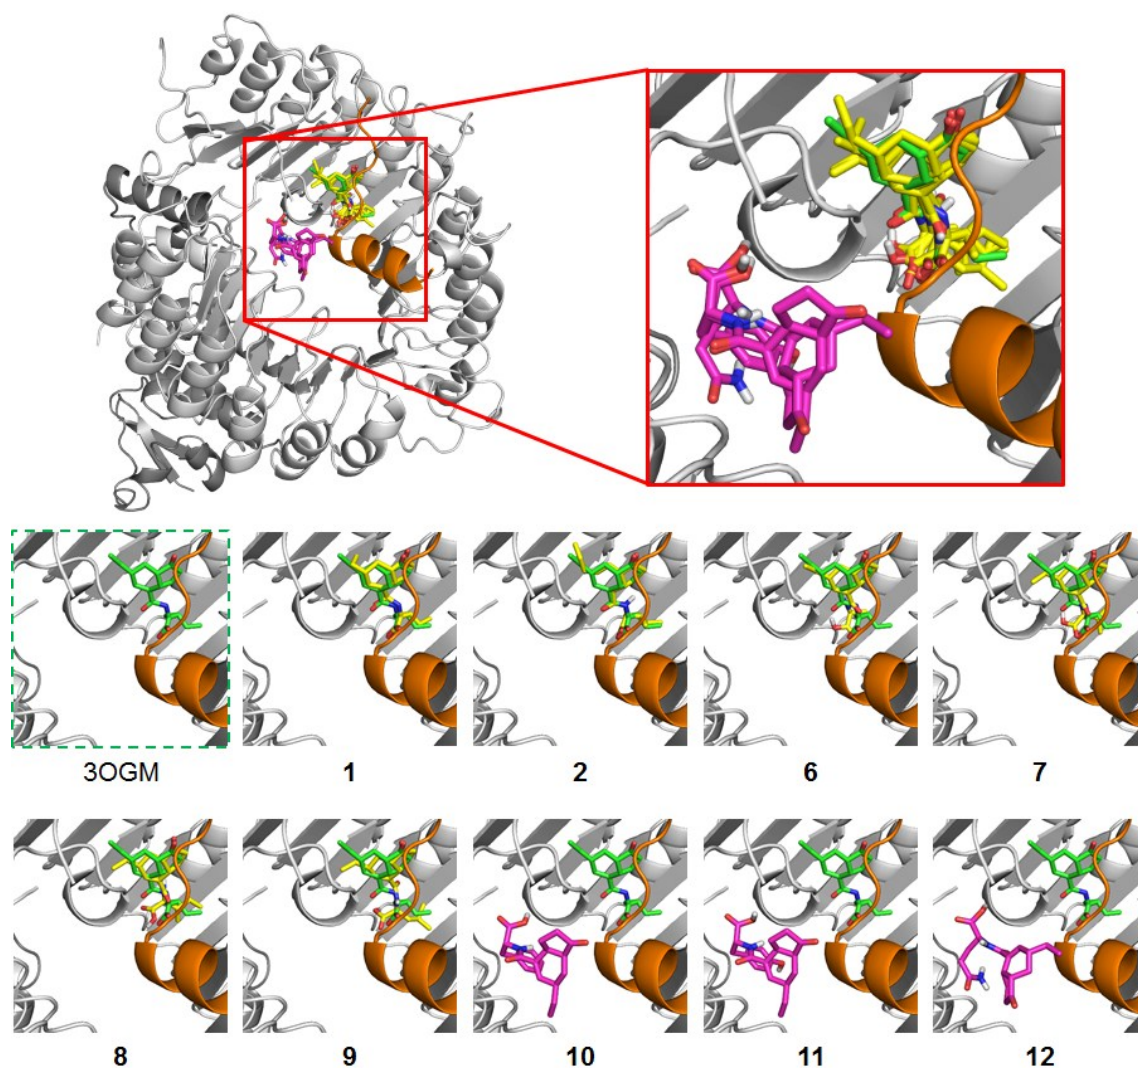

**Figure. S1 Docking Study of CFA-AAs on COI1-JAZ1 complex protein *in silico*.**

Structure of COR in 3OGM is green. Structure of COR, JA-Ile, CFA-L-Ala, CFA-L-Val, CFA-L-Ile and CFA-L-Leu are yellow. Structure of CFA-L-Phe, CFA-L-Tyr and CFA-L-Gln are purple. Yellow compounds entry in COI1-COR-JAZ binding pocket but purples cannot.

**Table S1** The hydrogen bonds network obtained in the docking study between CFA-AAs (**6-12**) and COI1-JAZ1 co-receptor.

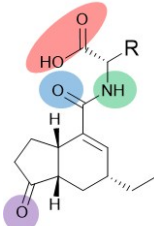

| ligand    | binding free energy (kcal/mol) | distance from functional groups (Å) |               |      |          |          |      |      |      |
|-----------|--------------------------------|-------------------------------------|---------------|------|----------|----------|------|------|------|
|           |                                | COI1                                |               |      |          |          |      |      | JAZ1 |
|           |                                | R85                                 | R348          | E350 | Y386     | R409     | Y444 | R496 | A204 |
| <b>1</b>  | -11.1 ± 0.1                    | 2.6                                 | 2.9, 3.0, 3.4 | 3.1  | 3.0, 3.2 | 3.4      | 3.2  | 2.9  | 2.8  |
| <b>2</b>  | -10.3 ± 0.1                    | 2.4                                 | 2.9, 3.0, 3.2 | —    | —        | 2.6      | 3.5  | 3.3  | 3.1  |
| <b>6</b>  | -9.8 ± 0.1                     | 3.0, 3.0, 3.5                       | 2.9, 3.0      | —    | 2.8      | 3.1, 3.3 | 3.3  | 3.0  | 3.1  |
| <b>7</b>  | -9.8 ± 0.1                     | 2.9, 3.2                            | 3.0, 3.4      | —    | 2.7      | 2.9, 3.2 | 3.3  | 2.9  | 3.1  |
| <b>8</b>  | -9.7 ± 0.1                     | 2.8, 3.2                            | 3.3           | —    | 2.7      | 3.0, 3.4 | 3.3  | 2.9  | 3.1  |
| <b>9</b>  | -9.7 ± 0.1                     | 3.0, 3.3                            | 2.8, 3.5      | —    | 3.3      | 3.0, 3.2 | —    | 3.0  | 2.8  |
| <b>10</b> | -8.2 ± 0.1                     | —                                   | —             | —    | —        | —        | —    | —    | —    |
| <b>11</b> | -8.2 ± 0.1                     | —                                   | —             | —    | —        | —        | —    | —    | —    |
| <b>12</b> | -7.1 ± 0.1                     | —                                   | —             | —    | —        | —        | —    | —    | —    |

Docking simulation of **1**, **2** and CFA-AAs (**6-12**) were calculated by AutoDock Vina 1.1.2 software. This table shows binding free energy and distance within 3.5 Å between the amino acids in binding pocket of COI1-JAZ1 and ligands, oxygen of amide is colored in blue, amide nitrogen in green, oxygen atoms of carboxyl acid in red, oxygen atom of ketone in purple.

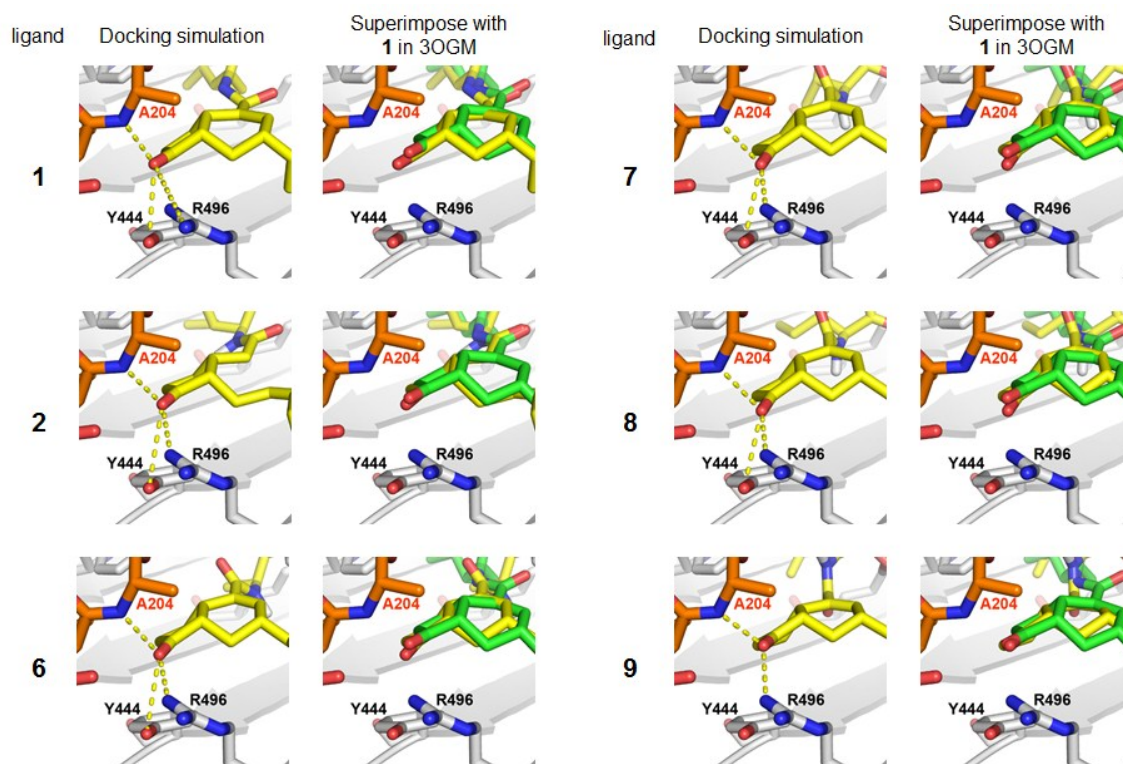

**Figure. S2 Docking Study of CFA-AAs on COI1-JAZ1 complex protein *in silico*.**

Structure of COR in 3OGM is green. Structure of COR, JA<sub>l</sub>le, CFA-L-Ala, CFA-L-Val, CFA-L-Ile and CFA-L-Leu are yellow. In docking simulations (left), yellow line represents the distance within 3.5 Å from ketone carbonyl: Y444 (COI1), R496 (COI1) and A204 (JAZ1).

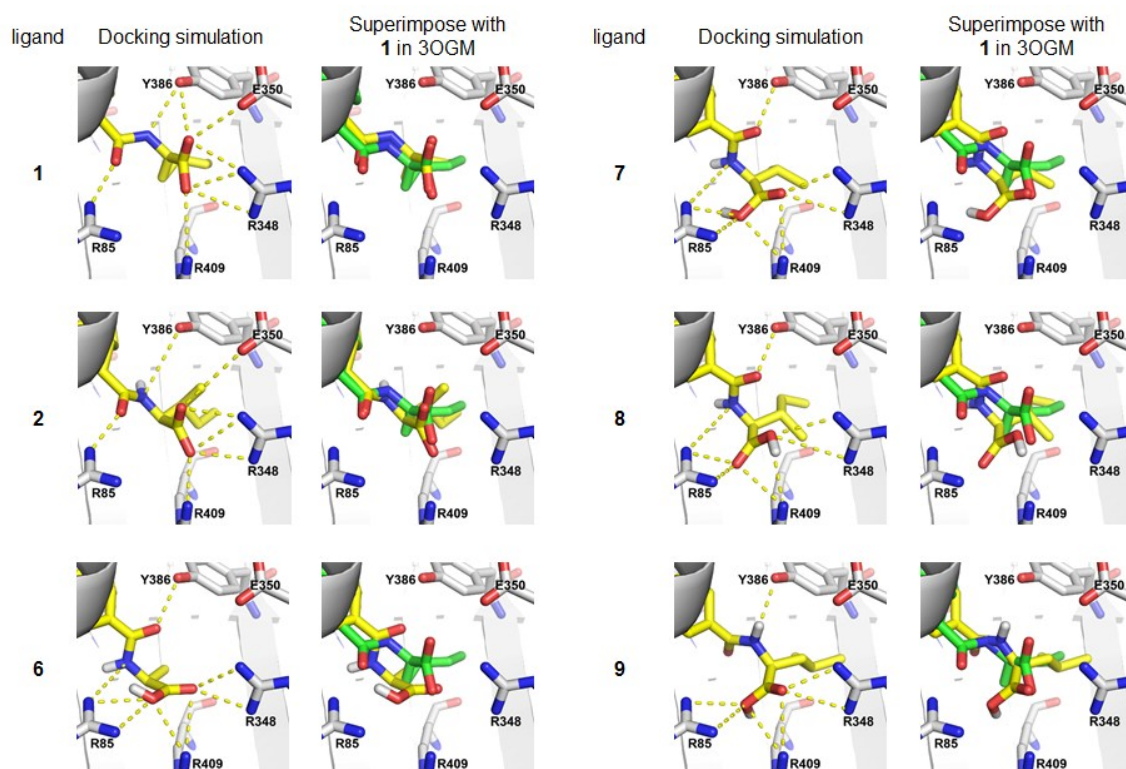

**Figure. S3 Docking Study of CFA-AAs on COI1-JAZ1 complex protein *in silico*.**

Structure of COR in 3OGM is green. Structure of COR, JA-Ile, CFA-L-Ala, CFA-L-Val, CFA-L-Ile and CFA-L-Leu are yellow. In docking simulations (left), yellow line represents the distance within 3.5 Å from the amino acids of COI1, such as R85, R348, E350, Y386 and R409, and amide carbonyl, amide nitrogen and oxygen atoms of carboxyl acid of ligands.



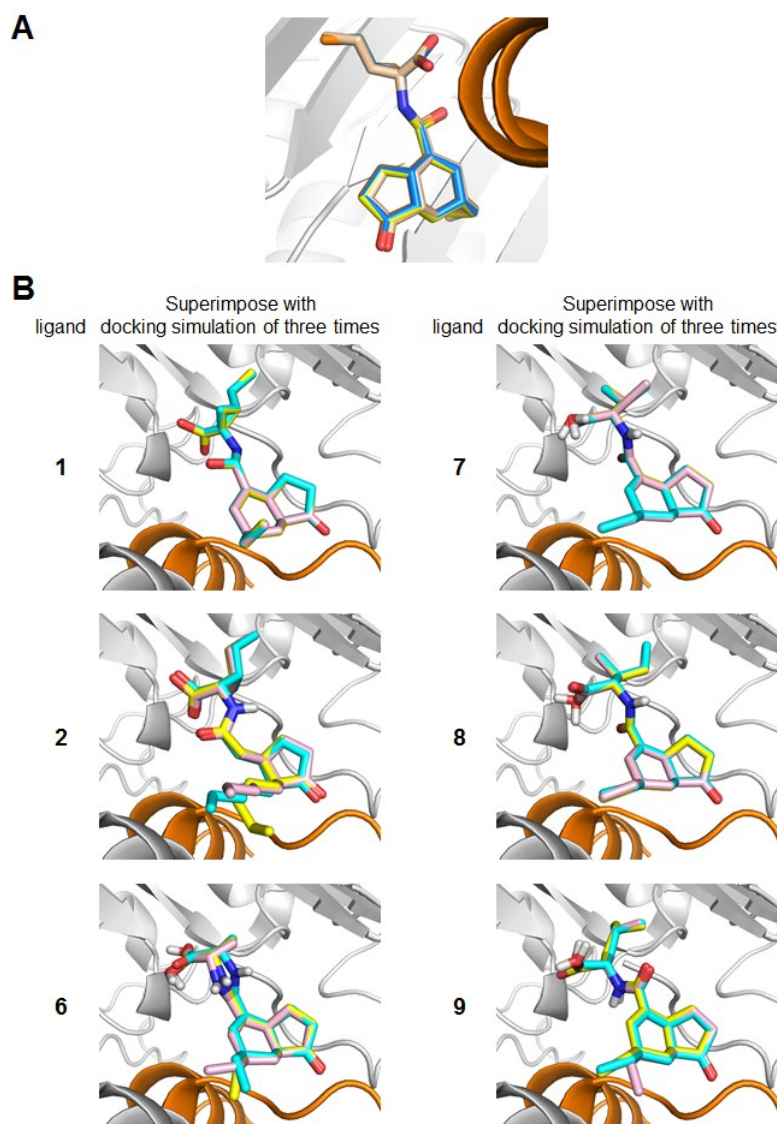

**Figure. S4 Docking Study of CFA-AAs on COI1-JAZ1 complex protein *in silico*.**

**A:** Superimposed structures of the docking study in each grid size of COR (1) on COI1-JAZ1 complex protein *in silico*, showing the reproducibility of these results. Structure of COR (1) calculated in 20×20×20 grid points (x, y, and z axes) is showed as blue, 30×30×30 grid points is yellow, 40×40×40 grid points is tint, and 50×50×50 grid points is orange stick models.

**B:** Superimposed structures of each three trial of the docking study of CFA-AAs on COI1-JAZ1 complex protein *in silico*, showing the reproducibility of these results. First calculated structure of COR (1), JA-Ile (2), CFA-L-Ala (6), CFA-L-Val (7), CFA-L-Ile (8) and CFA-L-Leu (9) are showed as yellow, second are cyan, and third are pink stick models.

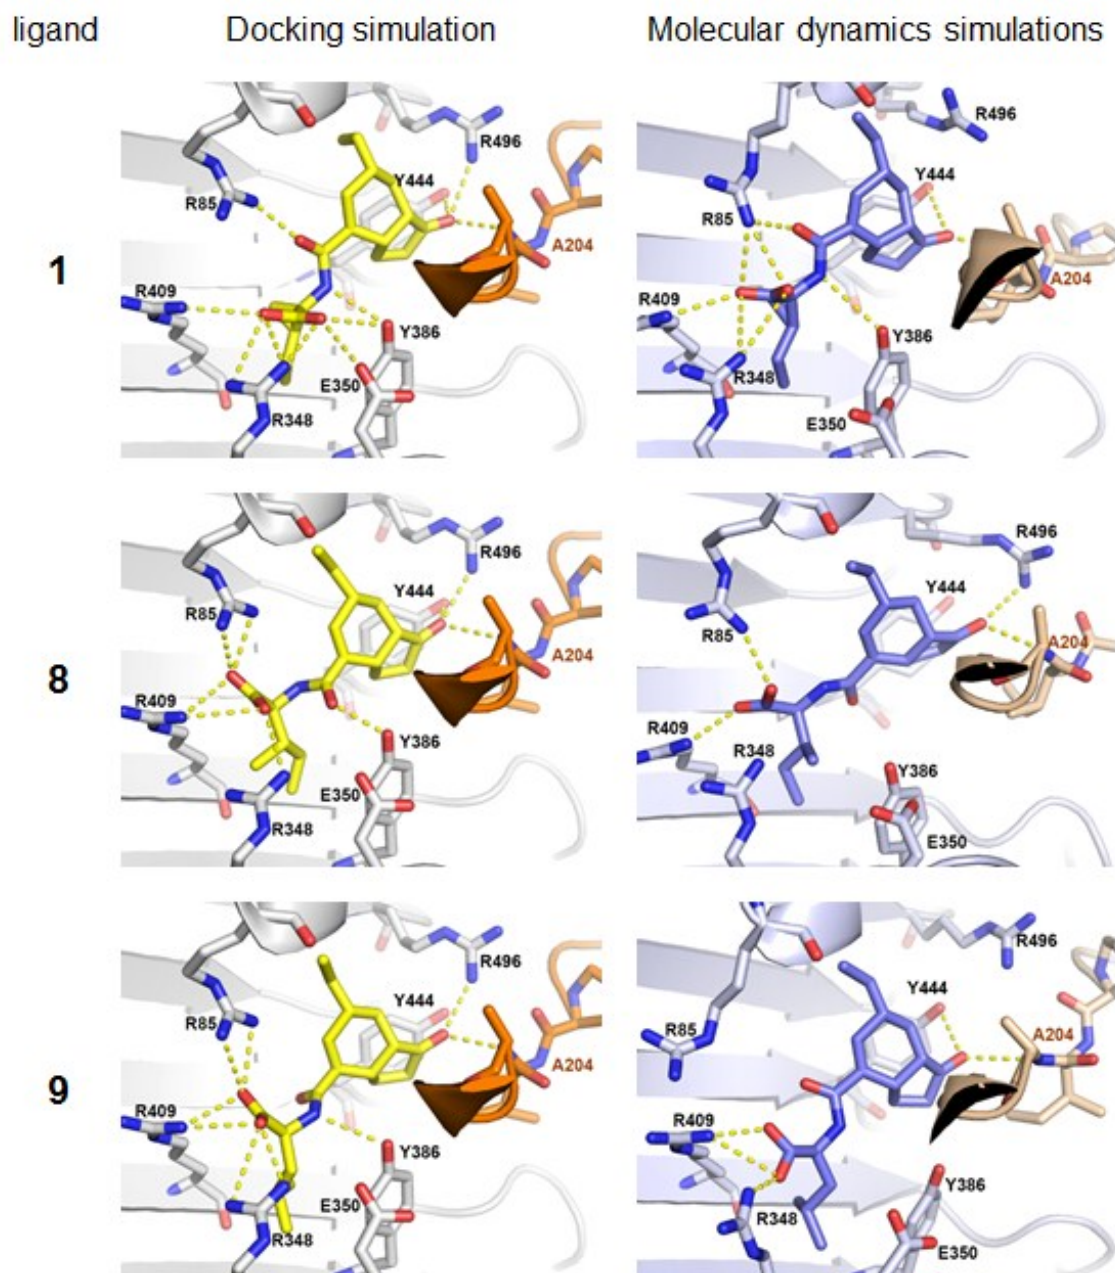

**Figure. S5 Molecular dynamics (MD) simulations of the COI1-JAZ1 with COR, CFA-Ile and CFA-Leu.**

In docking simulations (left) and in MD simulations (right), yellow line represents the distance within 3.5 Å from the amino acids of COI1 or JAZ1, such as R85, R348, E350, Y386, R409, Y444, R496 and A204 (JAZ1), and ketone carbonyl, amide carbonyl, amide nitrogen or oxygen atoms of carboxyl acid of ligands.

Supporting Information for Egoshi, Takaoka, Saito, Nukadzuka, Hayashi, Ishimaru, Yamakoshi, Dodo, Sodeoka and Ueda; Dual function of coronatine as a bacterial virulence factor against plants: possible COII-JAZ-independent role.

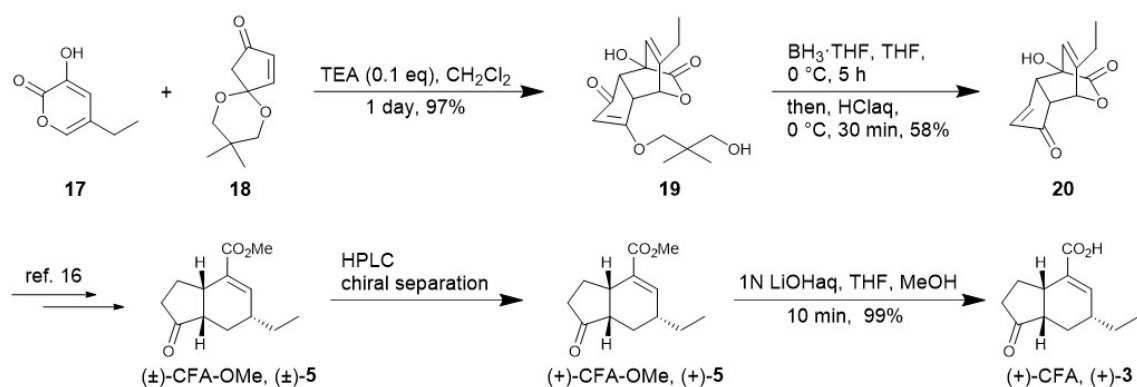

**Scheme S1** Synthesis of (+)-coronafacic acid (+)-3



*Supporting Information for Egoshi, Takaoka, Saito, Nukadzuka, Hayashi, Ishimaru, Yamakoshi, Dodo, Sodeoka and Ueda; Dual function of coronatine as a bacterial virulence factor against plants: possible COII-JAZ-independent role.*

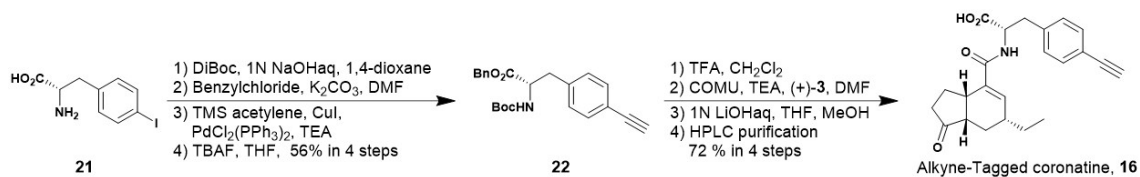

**Scheme. S2** Synthesis of Alkyne-Tagged coronatine (16)

## Materials and Methods

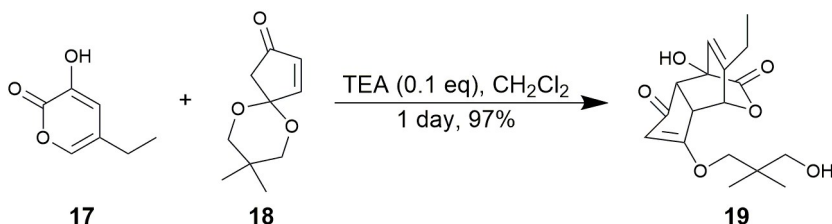

(3*aR*,4*S*,7*S*,7*aS*)-5-ethyl-7-hydroxy-3-(3-hydroxy-2,2-dimethylpropoxy)-3*a*,4,7,7*a*-tetrahydro-1*H*-4,7-(epoxymethano)indene-1,8-dione (**19**)

To a solution of 5-ethyl-3-hydroxypyron-2-one [*cas.* 1187021-54-0] **17** (1.40 g, 10.0 mmol) in CH<sub>2</sub>Cl<sub>2</sub> (150 mL) was added cyclopentene [*cas.* 129822-78-2] **18** (2.17 g, 11.1 mmol) and TEA (10.9 mg, 1.07 mmol) at 0 °C under argon atmosphere. The reaction mixture was stirred for 2 days. After evaporation, the residue was purified by silica gel column chromatography (*n*-hexane/EtOAc = 5/1). Each solution was concentrated by evaporation gave **19** (3.14mg, 9.73 mmol, 97%) as a white solid.

<sup>1</sup>H-NMR (400 MHz, CDCl<sub>3</sub>) δ<sub>H</sub>: 6.07 (q, *J* = 2.0 Hz, 1H), 5.39 (d, *J* = 0.8 Hz, 1H), 5.02 (t, *J* = 2.0 Hz, 1H), 4.09 (s, 1H), 3.88 (dd, *J* = 20.8, 9.6 Hz, 2H), 3.50 (dd, *J* = 5.2, 3.2 Hz, 2H), 3.23 (ddd, *J* = 7.6, 1.6, 0.8 Hz, 1H), 2.81 (d, *J* = 7.6 Hz, 1H), 2.29 (qd, *J* = 7.2, 2.0 Hz, 2H), 1.98 (d, *J* = 5.2 Hz, 1H), 1.11 (t, *J* = 7.2, 3H), 1.03 (s, 3H), 1.02 (s, 3H); <sup>13</sup>C-NMR (100MHz, CDCl<sub>3</sub>) δ<sub>C</sub>: 201.7, 186.4, 172.4, 145.1, 128.0, 107.6, 77.8, 76.9, 76.1, 68.0, 50.5, 47.7, 36.6, 24.7, 21.3, 21.3, 11.0; IR (film) cm<sup>-1</sup>: 3346, 2964, 2927, 2877, 1769, 1680, 1589, 1473, 1387, 1345, 1299, 1256, 1230, 1187, 1048, 1005, 961; HRMS (ESI, positive) *m/z* [M+Na]<sup>+</sup> calcd. for C<sub>17</sub>H<sub>22</sub>O<sub>6</sub>Na: 345.1314, found: 345.1302.

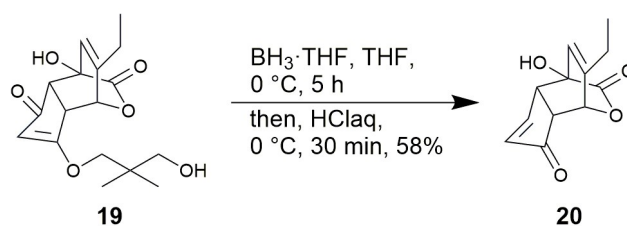

(3a*R*,4*S*,7*R*,7a*S*)-5-ethyl-7-hydroxy-3a,4,7,7a-tetrahydro-3*H*-4,7-(epoxymethano)indene-3,8-dione (**20**)

To a solution of **19** (219.2 g, 0.659 mmol) in THF (16 mL) was added  $\text{BH}_3 \cdot \text{THF}$  solution (1M in THF, 1.2 mL) at 0 °C under argon atmosphere. The reaction mixture was stirred for 3 h, and then  $\text{BH}_3 \cdot \text{THF}$  solution (1M in THF, 1.2 mL) was added again. The reaction mixture was stirred for 3 h, and then 6M HCl aq (3.5 mL) was added. After the reaction mixture was stirred for 30 min, the reaction mixture was quenched with  $\text{H}_2\text{O}$ . The mixture was extracted with EtOAc (3 × 50 mL) and brine (50 mL) washed. The organic layer was dried over  $\text{Na}_2\text{SO}_4$ , and filtered. After evaporation, the residue was purified by silica gel column chromatography ( $\text{CHCl}_3/\text{MeOH} = 100/1$ ). Each solution was concentrated by evaporation gave **20** (86.2 mg, 0.392 mmol, 58%) as a colorless crystalline solid.

Compound data in Ref 16 [*cas.* 1260503-15-8]

#### HPLC chiral separation of CFA methyl ester

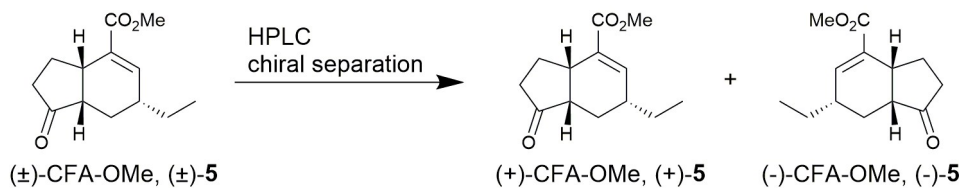

Synthesized racemic Coronafacic methyl ester (*rac.* CFA-Me [*cas.* 73961-72-5]) was chiral separation by HPLC on silica gel column (CHIRALPAK IA, 20 × 250 mm, DAICEL co., ltd.) with a solution (n-Hex : EtOH = 47 : 3) at 5 mL/min for 5 times recycled to give (-)-CFA-Me ((-)-**5**) (*Rt* = 235-242 min) and (+)-CFA-Me ((+)-**5**) (*Rt* = 246-255 min). Each solution was concentrated by evaporation gave (-)-**5** as a colorless crystalline solid and (+)-**5** as a colorless crystalline solid.

#### (+)-CFA-OMe, (+)-**5**

$^1\text{H-NMR}$  (400MHz,  $\text{CDCl}_3$ )  $\delta_{\text{H}}$ : 6.92 (s, 1H), 3.77 (s, 3H), 3.08 (dt.  $J = 11.2, 7.2$  Hz, 1H), 2.56 (dt.  $J = 12.4, 8.0$  Hz, 1H), 2.45-2.15 (m, 4H), 1.86 (dt.  $J = 13.2, 4.8$  Hz, 1H), 1.63-1.35 (m, 3H), 1.08 (td.  $J = 13.2, 11.2$  Hz, 1H), 0.98 (t.  $J = 7.2$  Hz, 3H);  $^{13}\text{C-NMR}$  (100MHz,  $\text{CDCl}_3$ )  $\delta_{\text{C}}$ : 220.4, 167.3, 144.2, 131.3, 51.7, 46.7, 38.2, 37.7, 36.2, 28.2, 27.8, 25.8, 11.2; IR (film)  $\text{cm}^{-1}$ : 2957, 2877, 2858, 1742, 1712, 1641, 1464, 1436, 1259, 1145, 1098, 1069, 752; HRMS (ESI, positive)  $m/z$   $[\text{M}+\text{Na}]^+$  calcd. for  $\text{C}_{13}\text{H}_{18}\text{O}_3\text{Na}$ : 245.1154, found: 245.1149;  $[\alpha]_{\text{D}}^{24} +122^\circ$  ( $c$  0.20,  $\text{CHCl}_3$ ).

#### (-)-CFA-OMe, (-)-**5**

$^1\text{H-NMR}$  (400MHz,  $\text{CDCl}_3$ )  $\delta_{\text{H}}$ : 6.92 (s, 1H), 3.77 (s, 3H), 3.08 (dt.  $J = 11.2, 7.2$  Hz, 1H), 2.56 (dt.  $J = 12.4, 8.0$  Hz, 1H), 2.45-2.15 (m, 4H), 1.86 (dt.  $J = 13.2, 4.8$  Hz, 1H), 1.63-1.35 (m, 3H), 1.08 (td.  $J = 13.2, 11.2$  Hz, 1H), 0.98 (t.  $J = 7.2$  Hz, 3H);  $^{13}\text{C-NMR}$  (100MHz,  $\text{CDCl}_3$ )  $\delta_{\text{C}}$ : 220.4, 167.3, 144.2, 131.3, 51.7, 46.7, 38.2, 37.7, 36.2, 28.2, 27.8, 25.8, 11.2; IR (film)  $\text{cm}^{-1}$ : 2957, 2877, 2858, 1742, 1712, 1641, 1464, 1436, 1259, 1145, 1098, 1069, 752; HRMS (ESI, positive)  $m/z$   $[\text{M}+\text{Na}]^+$  calcd. for  $\text{C}_{13}\text{H}_{18}\text{O}_3\text{Na}$ : 245.1154, Found: 245.1150;  $[\alpha]_{\text{D}}^{23} -122^\circ$  ( $c$  0.26,  $\text{CHCl}_3$ ).

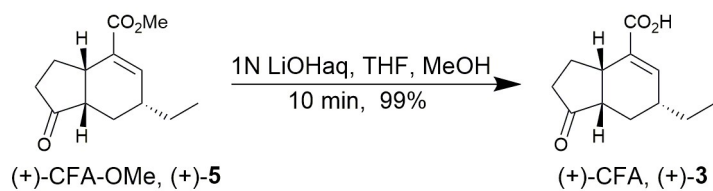

(+)-CFA, (+)-**3** [*cas.* 62251-98-3]

Compound (+)-**5** (5.4 mg, 24.3  $\mu\text{mol}$ ) in MeOH (0.2 mL) was added THF (0.1 mL) and 1N aqueous LiOH (0.1 mL). After the reaction mixture was stirred for 10 min, the reaction mixture was quenched with 1N aqueous KHSO<sub>4</sub> (0.2 mL). The mixture was extracted with EtOAc (3  $\times$  5 mL). The organic layer was dried over Na<sub>2</sub>SO<sub>4</sub>, and filtered. After evaporation, the residue was purified by HPLC on silica gel column (COSMOSIL SC<sub>18</sub>-AR, 20  $\times$  250 mm, Nacalai Tesque co., ltd.) with solution (CH<sub>3</sub>CN / aqueous = 30 / 70) in 0.1% HCO<sub>2</sub>H at 6.5 mL/min to give (+)-**3** (Rt = 28-31 min), respectively. Each solution was concentrated *in vacuo.*, gave (+)-**3** (5.0 mg, 24.0  $\mu\text{mol}$ , 99%) as a colorless crystalline solid.

[ $\alpha$ ]<sub>D</sub><sup>23</sup> +120° (*c* 0.25, MeOH)

(-)-**3** [*cas.* 87335-74-8]

[ $\alpha$ ]<sub>D</sub><sup>23</sup> -121° (*c* 0.40, MeOH)



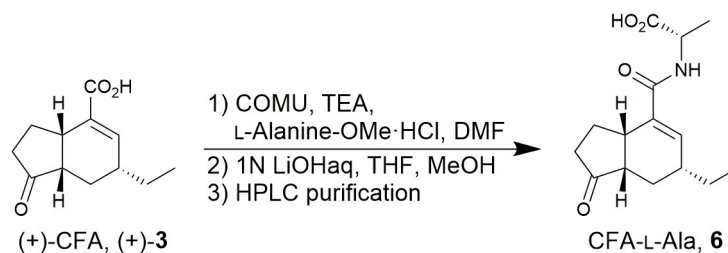

#### CFA-L-Ala (6)

To a solution of (+)-CFA (2.1 mg, 10.1  $\mu\text{mol}$ ) in DMF (0.25 mL) was added COMU (4.7 mg, 11.0  $\mu\text{mol}$ ) and TEA (2.9 mg, 28.7  $\mu\text{mol}$ ) at room temperature under argon atmosphere. The reaction mixture was stirred for 10 min, and then L-Alanine methyl ester hydrochloride (1.6 mg, 11.5  $\mu\text{mol}$ ) was added. After the reaction mixture was stirred for 2.5 h, the reaction mixture was quenched with saturated aqueous  $\text{NaHCO}_3$ . The mixture was extracted with EtOAc ( $3 \times 5$  mL). The organic layer was dried over  $\text{Na}_2\text{SO}_4$ , and filtered. After evaporation, the residue was purified by silica gel column chromatography (*n*-hexane/EtOAc = 3/1). Each solution was concentrated by evaporation gave mixture compound. To a solution of the residue in MeOH (0.2 mL) was added THF (0.1 mL) and 1N aqueous LiOH (0.1 mL). After the reaction mixture was stirred for 10 min, the reaction mixture was quenched with 1N aqueous  $\text{KHSO}_4$ . The mixture was extracted with EtOAc ( $3 \times 5$  mL). The organic layer was dried over  $\text{Na}_2\text{SO}_4$ , and filtered. After evaporation, the residue was purified by HPLC on silica gel column (COSMOSIL SC<sub>18</sub>-AR,  $20 \times 250$  mm, Nacalai Tesque co., ltd.) with 0.05%  $\text{HCO}_2\text{H}$  solution (MeOH / aqueous = 45 / 55) at 8.0 mL/min to give **6** ( $R_t$  = 31-35 min), respectively. Each solution was concentrated by evaporation gave **6** (2.1 mg, 7.52  $\mu\text{mol}$ , 75%) as a colorless crystalline solid.

$^1\text{H}$ -NMR (400MHz,  $\text{CDCl}_3$ )  $\delta_{\text{H}}$ : 6.40 (s, 1H), 6.36 (brs, 1H), 4.61 (1H, brs), 3.17 (m, 1H), 2.50-2.24 (m, 4H), 2.15 (m, 1H), 1.90 (dt.  $J$  = 12.8, 4.4 Hz, 1H), 1.68-1.32 (m, 6H), 1.07 (td.  $J$  = 12.8, 11.2 Hz, 1H), 0.99 (t.  $J$  = 7.6 Hz, 3H);  $^{13}\text{C}$ -NMR (100MHz,  $\text{CDCl}_3$ )  $\delta_{\text{C}}$ : 220.1, 168.6, 137.9, 135.1, 46.4, 38.1, 36.1, 28.0, 27.7, 25.9, 17.8, 11.3; IR (film)  $\text{cm}^{-1}$ : 3333, 2964, 2931, 2877, 1735, 1655, 1618, 1530, 1458, 1450, 1213, 1152, 753; HR MS (ESI, negative)  $m/z$   $[\text{M-H}]^-$  calcd. for  $\text{C}_{15}\text{H}_{20}\text{NO}_4$ : 278.1392, found: 278.1395;  $[\alpha]_{\text{D}}^{23} +77^\circ$  ( $c$  0.10,  $\text{CHCl}_3$ ).

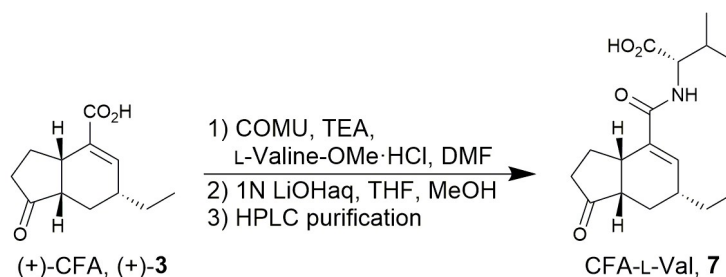

#### CFA-L-Val (**7**)

To a solution of (+)-CFA (2.1 mg, 10.1  $\mu\text{mol}$ ) in DMF (0.25 mL) was added COMU (4.6 mg, 10.7  $\mu\text{mol}$ ) and TEA (2.9 mg, 28.7  $\mu\text{mol}$ ) at room temperature under argon atmosphere. The reaction mixture was stirred for 10 min, and then L-Valine methyl ester hydrochloride (1.9 mg, 11.3  $\mu\text{mol}$ ) was added. After the reaction mixture was stirred for 2 h, the reaction mixture was quenched with saturated aqueous  $\text{NaHCO}_3$ . The mixture was extracted with EtOAc ( $3 \times 5$  mL). The organic layer was dried over  $\text{Na}_2\text{SO}_4$ , and filtered. After evaporation, the residue was purified by silica gel column chromatography (*n*-hexane/EtOAc = 3/1). Each solution was concentrated by evaporation gave mixture compound. To a solution of the residue in MeOH (0.2 mL) was added THF (0.1 mL) and 1N aqueous LiOH (0.1 mL). After the reaction mixture was stirred for 10 min, the reaction mixture was quenched with 1N aqueous  $\text{KHSO}_4$ . The mixture was extracted with EtOAc ( $3 \times 5$  mL). The organic layer was dried over  $\text{Na}_2\text{SO}_4$ , and filtered. After evaporation, the residue was purified by HPLC on silica gel column (COSMOSIL SC<sub>18</sub>-AR,  $20 \times 250$  mm, Nacalai Tesque co., ltd.) with 0.05%  $\text{HCO}_2\text{H}$  solution (MeOH / aqueous = 50 / 50) at 8.0 mL/min to give **7** ( $R_t$  = 40-44 min), respectively. Each solution was concentrated by evaporation gave **7** (1.7 mg, 4.58  $\mu\text{mol}$ , 64%) as a colorless crystalline solid.

$^1\text{H}$ -NMR (400MHz,  $\text{CDCl}_3$ )  $\delta_{\text{H}}$ : 6.41 (s, 1H), 6.27 (brs, 1H), 4.58 (brs, 1H), 3.18 (dt.  $J$  = 9.6, 7.2, 1H), 2.48-2.23 (m, 5H), 2.16 (m, 1H), 1.91 (dt.  $J$  = 12.8, 4.4 Hz, 1H), 1.63-1.33 (m, 3H), 1.07 (td.  $J$  = 12.8, 11.2 Hz, 1H), 1.03-0.96 (m, 9H);  $^{13}\text{C}$ -NMR (100MHz,  $\text{CDCl}_3$ )  $\delta_{\text{C}}$ : 220.1, 168.5, 137.6, 135.4, 46.4, 38.1, 37.4, 36.2, 30.1, 28.1, 27.8, 26.0, 19.2, 18.0, 11.3; IR (film)  $\text{cm}^{-1}$ : 3333, 2965, 2929, 2875, 1735, 1654, 1617, 1522, 1465, 1405, 1306, 1215, 1148, 755; HR MS (ESI, negative)  $m/z$   $[\text{M}-\text{H}]^-$  calcd. for  $\text{C}_{17}\text{H}_{24}\text{NO}_4$ : 306.1705, found: 306.1710.  $[\alpha]_{\text{D}}^{23} +64^\circ$  ( $c$  0.11,  $\text{CHCl}_3$ ).

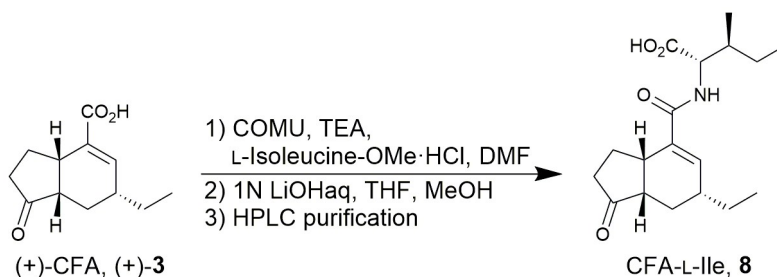

#### CFA-L-Ile (**8**)

To a solution of (+)-CFA (3.1 mg, 14.9  $\mu\text{mol}$ ) in DMF (0.25 mL) was added COMU (4.6 mg, 10.7  $\mu\text{mol}$ ) and TEA (2.9 mg, 28.7  $\mu\text{mol}$ ) at room temperature under argon atmosphere. The reaction mixture was stirred for 10 min, and then L-Isoleucine methyl ester hydrochloride (2.0 mg, 11.0  $\mu\text{mol}$ ) was added. After the reaction mixture was stirred for 2.5 h, the reaction mixture was quenched with saturated aqueous  $\text{NaHCO}_3$ . The mixture was extracted with EtOAc ( $3 \times 5$  mL). The organic layer was dried over  $\text{Na}_2\text{SO}_4$ , and filtered. After evaporation, the residue was purified by silica gel column chromatography (*n*-hexane/EtOAc = 3/1). Each solution was concentrated by evaporation gave mixture compound. To a solution of the residue in MeOH (0.2 mL) was added THF (0.1 mL) and 1N aqueous LiOH (0.1 mL). After the reaction mixture was stirred for 10 min, the reaction mixture was quenched with 1N aqueous  $\text{KHSO}_4$ . The mixture was extracted with EtOAc ( $3 \times 5$  mL). The organic layer was dried over  $\text{Na}_2\text{SO}_4$ , and filtered. After evaporation, the residue was purified by HPLC on silica gel column (COSMOSIL SC<sub>18</sub>-AR,  $20 \times 250$  mm, Nacalai Tesque co., ltd.) with 0.05%  $\text{HCO}_2\text{H}$  solution (MeOH / aqueous = 55 / 45) at 8.0 mL/min to give **8** ( $R_t$  = 48-53 min), respectively. Each solution was concentrated by evaporation gave **8** (2.1 mg, 6.53  $\mu\text{mol}$ , 65%) as a colorless crystalline solid.

$^1\text{H}$ -NMR (400MHz,  $\text{CDCl}_3$ )  $\delta_{\text{H}}$ : 6.40 (s, 1H), 6.30 (brs, 1H), 4.64 (brs, 1H), 3.18 (m, 1H), 2.48-2.24 (m, 4H), 2.16 (m, 1H), 2.01 (m, 1H), 1.89 (dt,  $J$  = 12.8, 4.4 Hz, 1H), 1.69-1.33 (m, 4H), 1.30-1.21 (m, 1H), 1.07 (td,  $J$  = 12.8, 11.6 Hz, 1H), 1.00-0.92 (m, 9H);  $^{13}\text{C}$ -NMR (100MHz,  $\text{CDCl}_3$ )  $\delta_{\text{C}}$ : 220.2, 168.7, 137.7, 135.3, 46.4, 41.0, 38.1, 37.4, 36.2, 28.1, 27.7, 25.9, 25.1, 22.9, 21.9, 11.3; IR (film)  $\text{cm}^{-1}$ : 3345, 2965, 2935, 2877, 1734, 1654, 1622, 1521, 1463, 1405, 1385, 1329, 1217, 1145, 755; HRMS (ESI, negative)  $m/z$   $[\text{M}-\text{H}]^-$  calcd. for  $\text{C}_{18}\text{H}_{26}\text{NO}_4$ : 320.1862, found: 320.1867;  $[\alpha]_{\text{D}}^{23} +33^\circ$  ( $c$  0.105,  $\text{CHCl}_3$ ).

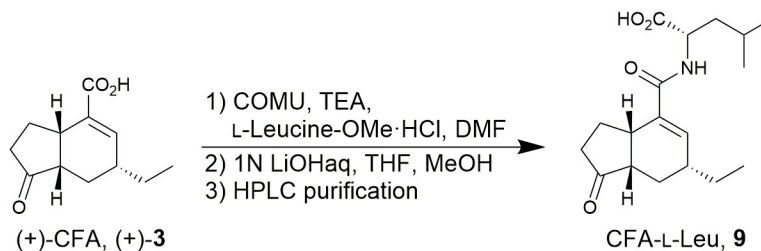

#### CFA-L-Leu (**9**)

To a solution of (+)-CFA (2.1 mg, 10.1  $\mu\text{mol}$ ) in DMF (0.25 mL) was added COMU (4.6 mg, 10.7  $\mu\text{mol}$ ) and TEA (2.9 mg, 28.7  $\mu\text{mol}$ ) at room temperature under argon atmosphere. The reaction mixture was stirred for 10 min, and then L-Leucine methyl ester hydrochloride (2.0 mg, 11.0  $\mu\text{mol}$ ) was added. After the reaction mixture was stirred for 2 h, the reaction mixture was quenched with saturated aqueous  $\text{NaHCO}_3$ . The mixture was extracted with EtOAc ( $3 \times 5$  mL). The organic layer was dried over  $\text{Na}_2\text{SO}_4$ , and filtered. After evaporation, the residue was purified by silica gel column chromatography (*n*-hexane/EtOAc = 3/1). Each solution was concentrated by evaporation gave mixture compound. To a solution of the residue in MeOH (0.2 mL) was added THF (0.1 mL) and 1N aqueous LiOH (0.1 mL). After the reaction mixture was stirred for 10 min, the reaction mixture was quenched with 1N aqueous  $\text{KHSO}_4$ . The mixture was extracted with EtOAc ( $3 \times 5$  mL). The organic layer was dried over  $\text{Na}_2\text{SO}_4$ , and filtered. After evaporation, the residue was purified by HPLC on silica gel column (COSMOSIL SC<sub>18</sub>-AR,  $20 \times 250$  mm, Nacalai Tesque co., ltd.) with 0.05%  $\text{HCO}_2\text{H}$  solution (MeOH / aqueous = 55 / 45) at 8.0 mL/min to give **9** ( $R_t$  = 49-54 min), respectively. Each solution was concentrated by evaporation gave **9** (2.7 mg, 8.40  $\mu\text{mol}$ , 83%) as a colorless crystalline solid.

$^1\text{H}$ -NMR (400MHz,  $\text{CDCl}_3$ )  $\delta_{\text{H}}$ : 6.38 (s, 1H), 6.16 (brs, 1H), 4.64 (brs, 1H), 3.16 (dt.  $J$  = 9.2, 6.8, 1H), 2.48-2.24 (m, 4H), 2.16 (m, 1H), 1.90 (dt.  $J$  = 12.8, 4.4 Hz, 1H), 1.82-1.32 (m, 6H), 1.07 (td.  $J$  = 12.8, 11.2 Hz, 1H), 1.00-0.94 (m, 9H);  $^{13}\text{C}$ -NMR (100MHz,  $\text{CDCl}_3$ )  $\delta_{\text{C}}$ : 220.2, 168.3, 137.6, 135.4, 46.4, 38.1, 37.6, 37.4, 36.2, 28.1, 27.8, 26.0, 25.3, 15.6, 11.6, 11.3; IR (film)  $\text{cm}^{-1}$ : 3308, 2958, 2936, 2872, 1734, 1653, 1617, 1532, 1465, 1444, 1333, 1270, 1231, 1152, 755; HRMS (ESI, negative)  $m/z$   $[\text{M-H}]^-$  calcd. for  $\text{C}_{18}\text{H}_{26}\text{NO}_4$ : 320.1862, found: 320.1862;  $[\alpha]_{\text{D}}^{23} +36^\circ$  ( $c$  0.14,  $\text{CHCl}_3$ ).

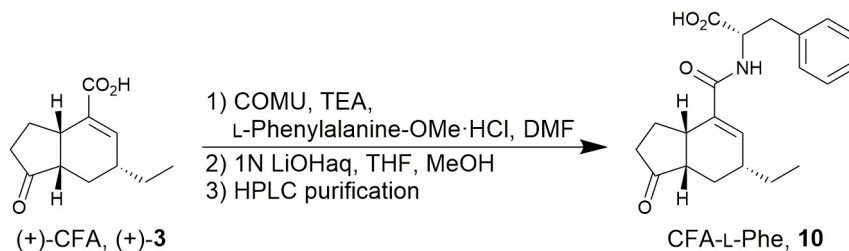

#### CFA-L-Phe (**10**)

To a solution of (+)-CFA (1.5 mg, 7.20  $\mu$ mol) in DMF (0.22 mL) was added COMU (4.6 mg, 10.7  $\mu$ mol) and TEA (2.9 mg, 28.7  $\mu$ mol) at room temperature under argon atmosphere. The reaction mixture was stirred for 10 min, and then L-Phenylalanine methyl ester hydrochloride (2.4 mg, 11.1  $\mu$ mol) was added. After the reaction mixture was stirred for 1.5 h, the reaction mixture was quenched with saturated aqueous  $\text{NaHCO}_3$ . The mixture was extracted with EtOAc ( $3 \times 5$  mL). The organic layer was dried over  $\text{Na}_2\text{SO}_4$ , and filtered. After evaporation, the residue was purified by silica gel column chromatography (*n*-hexane/EtOAc = 3/1). Each solution was concentrated by evaporation gave mixture compound. To a solution of the residue in MeOH (0.2 mL) was added THF (0.1 mL) and 1N aqueous LiOH (0.1 mL). After the reaction mixture was stirred for 10 min, the reaction mixture was quenched with 1N aqueous  $\text{KHSO}_4$ . The mixture was extracted with EtOAc ( $3 \times 5$  mL). The organic layer was dried over  $\text{Na}_2\text{SO}_4$ , and filtered. After evaporation, the residue was purified by HPLC on silica gel column (COSMOSIL SC<sub>18</sub>-AR,  $20 \times 250$  mm, Nacalai Tesque co., ltd.) with 0.05%  $\text{HCO}_2\text{H}$  solution (MeOH / aqueous = 55 / 45) at 8.0 mL/min to give **10** (Rt = 49-53 min), respectively. Each solution was concentrated by evaporation gave **10** (1.8 mg, 5.06  $\mu$ mol, 70%) as a colorless crystalline solid.

$^1\text{H}$ -NMR (400MHz,  $\text{CDCl}_3$ )  $\delta_{\text{H}}$ : 7.36-7.27 (m, 3H), 7.21 (dd,  $J = 8.0, 1.6$  Hz, 2H), 6.21 (s, 1H), 6.09 (brs, 1H), 4.86 (td,  $J = 6.0, 6.0$  Hz, 1H), 3.34 (dd,  $J = 6.0, 1.6$  Hz, 1H), 3.18 (dd,  $J = 6.0, 1.6$  Hz, 1H), 3.07 (dt,  $J = 10.4, 6.8$  Hz, 1H), 2.38-2.15 (m, 4H), 2.09 (m, 1H), 1.86 (dt,  $J = 12.8, 4.8$  Hz, 1H), 1.54-1.28 (m, 3H), 1.00 (td,  $J = 12.8, 11.2$  Hz, 1H), 0.94 (t,  $J = 7.6$  Hz, 3H);  $^{13}\text{C}$ -NMR (100MHz,  $\text{CDCl}_3$ )  $\delta_{\text{C}}$ : 219.9, 168.7, 138.4, 135.8, 134.9, 129.4 (2C), 128.8 (2C), 127.4, 46.3, 38.1, 37.4, 36.9, 36.0, 27.9, 27.5, 26.0, 11.2; IR (film)  $\text{cm}^{-1}$ : 3333, 2959, 2932, 2872, 1739, 1653, 1617, 1521, 1497, 1456, 1269, 1218, 1152, 755; HRMS (ESI, negative)  $m/z$   $[\text{M-H}]^-$  calcd. for  $\text{C}_{21}\text{H}_{24}\text{NO}_4$ : 354.1705, found: 354.1707;  $[\alpha]_{\text{D}}^{22} +66^\circ$  ( $c$  0.10,  $\text{CHCl}_3$ ).



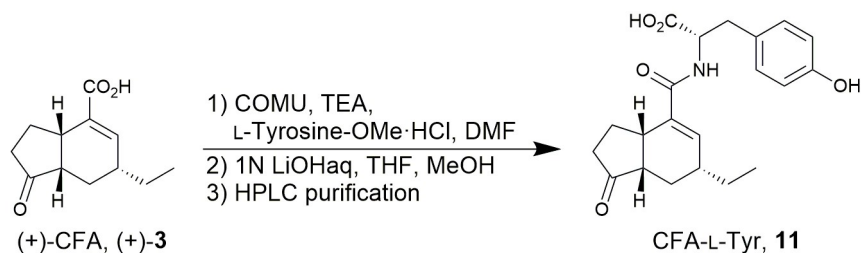

#### CFA-L-Tyr (**11**)

To a solution of (+)-CFA (1.5 mg, 7.20  $\mu\text{mol}$ ) in DMF (0.22 mL) was added COMU (4.7 mg, 11.0  $\mu\text{mol}$ ) and TEA (2.9 mg, 28.7  $\mu\text{mol}$ ) at room temperature under argon atmosphere. The reaction mixture was stirred for 10 min, and then L-Tyrosine methyl ester hydrochloride (2.6 mg, 11.2  $\mu\text{mol}$ ) was added. After the reaction mixture was stirred for 1.5 h, the reaction mixture was quenched with saturated aqueous  $\text{NaHCO}_3$ . The mixture was extracted with EtOAc ( $3 \times 5$  mL). The organic layer was dried over  $\text{Na}_2\text{SO}_4$ , and filtered. After evaporation, the residue was purified by silica gel column chromatography (*n*-hexane/EtOAc = 3/1). Each solution was concentrated by evaporation gave mixture compound. To a solution of the residue in MeOH (0.2 mL) was added THF (0.1 mL) and 1N aqueous LiOH (0.1 mL). After the reaction mixture was stirred for 10 min, the reaction mixture was quenched with 1N aqueous  $\text{KHSO}_4$ . The mixture was extracted with EtOAc ( $3 \times 5$  mL). The organic layer was dried over  $\text{Na}_2\text{SO}_4$ , and filtered. After evaporation, the residue was purified by HPLC on silica gel column (COSMOSIL SC<sub>18</sub>-AR,  $20 \times 250$  mm, Nacalai Tesque co., ltd.) with 0.05%  $\text{HCO}_2\text{H}$  solution (MeOH / aqueous = 55 / 45) at 8.0 mL/min to give **11** (Rt = 49-53 min), respectively. Each solution was concentrated by evaporation gave **11** (1.8 mg, 5.06  $\mu\text{mol}$ , 70%) as a colorless crystalline solid.

$^1\text{H-NMR}$  (400MHz,  $\text{CD}_3\text{OD}$ )  $\delta_{\text{H}}$ : 7.05 (d,  $J = 8.4$  Hz, 2H), 6.69 (d,  $J = 8.4$  Hz, 2H), 6.29 (s, 2H), 4.61 (brs, 1H), 3.19 (dd,  $J = 13.6, 4.4$  Hz, 1H), 3.14-2.90 (m, 2H), 2.37-2.21 (m, 2H), 2.17-2.04 (m, 2H), 1.76 (dt,  $J = 13.2, 4.8$  Hz, 1H), 1.53-1.34 (m, 3H), 1.07 (dt,  $J = 13.2, 10.8$  Hz, 1H), 0.98 (t,  $J = 7.2$  Hz, 3H);  $^{13}\text{C-NMR}$  (100MHz,  $\text{CD}_3\text{OD}$ )  $\delta_{\text{C}}$ : 222.9, 172.1, 157.3, 138.7, 138.3, 131.4 (2C), 129.6, 116.1 (2C), 84.0, 47.8, 38.7, 38.6, 37.6, 37.3, 29.1, 28.5, 27.2, 11.6; IR (film)  $\text{cm}^{-1}$ : 3333, 2964, 2931, 2854, 1733, 1653, 1616, 1516, 1457, 1261, 1226, 1146, 754; HRMS (ESI, negative)  $m/z$   $[\text{M-H}]^-$  calcd. for  $\text{C}_{21}\text{H}_{24}\text{NO}_5$ : 370.1654, found: 370.1658;  $[\alpha]_{\text{D}}^{22} +45^\circ$  (*c* 0.10, MeOH).

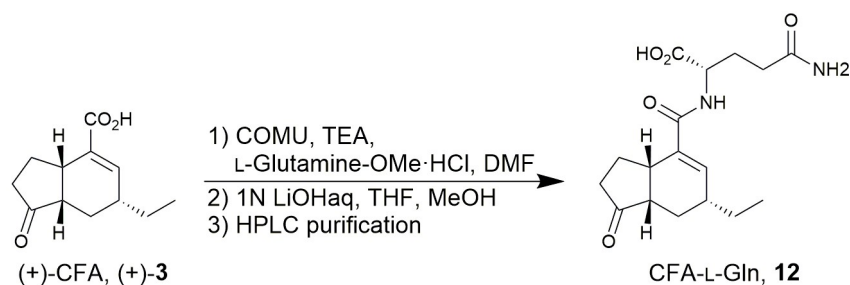

#### CFA-L-Gln (**12**)

To a solution of (+)-CFA (3.1 mg, 14.9  $\mu\text{mol}$ ) in DMF (0.3 mL) was added COMU (7.1 mg, 16.6  $\mu\text{mol}$ ) and TEA (2.9 mg, 28.7  $\mu\text{mol}$ ) at room temperature under argon atmosphere. The reaction mixture was stirred for 10 min, and then L-Glutamine methyl ester (2.5 mg, 17.1  $\mu\text{mol}$ ) was added. After the reaction mixture was stirred for 1.0 h, the reaction mixture was quenched with saturated aqueous  $\text{NaHCO}_3$ . The mixture was extracted with EtOAc ( $3 \times 5$  mL) and 1N  $\text{KHSO}_4$  aq washed. The organic layer was dried over  $\text{Na}_2\text{SO}_4$ , and filtered. After evaporation, to a solution of the residue in MeOH (0.2 mL) was added THF (0.1 mL) and 1N aqueous LiOH (0.1 mL). After the reaction mixture was stirred for 10 min, the reaction mixture was quenched with 1N aqueous  $\text{KHSO}_4$  (0.11 mL). After freeze dehydration and filtration, the residue was purified by HPLC on silica gel column (COSMOSIL SC<sub>18</sub>-AR,  $20 \times 250$  mm, Nacalai Tesque co., ltd.) with solution (MeOH / aqueous = 30 / 70) in 0.05%  $\text{HCO}_2\text{H}$  at 8.0 mL/min to give **12** (Rt = 48-52 min), respectively. Each solution was concentrated *in vacuo*., gave **12** formate (3.3 mg, 8.63  $\mu\text{mol}$ , 58%) as a colorless crystalline solid.

$^1\text{H-NMR}$  (400MHz,  $\text{CD}_3\text{OD}$ )  $\delta_{\text{H}}$ : 6.52 (s, 1H), 4.59 (brs, 1H), 3.18 (dt,  $J = 10.4, 6.8$  Hz, 1H), 2.44-2.28 (m, 6H), 2.26-2.12 (m, 2H), 2.05 (m, 1H) 1.80 (td,  $J = 12.8, 4.8$  Hz, 1H), 1.68-1.35 (m, 3H), 1.14 (td,  $J = 12.8, 11.2$  Hz, 1H), 1.01 (t,  $J = 7.6$  Hz, 3H);  $^{13}\text{C-NMR}$  (100MHz,  $\text{CD}_3\text{OD}$ )  $\delta_{\text{C}}$ : 223.0, 170.5, 138.5, 136.4, 85.0, 47.9, 38.8, 38.7, 37.3, 33.0, 29.1, 29.0, 28.8, 27.1, 11.6; IR (film)  $\text{cm}^{-1}$ : 3417, 2961, 2925, 2853, 1733, 1658, 1616, 1532, 1456, 1404, 1263, 1152, 757; HRMS (ESI, negative)  $m/z$   $[\text{M-H}]^-$  calcd. for  $\text{C}_{17}\text{H}_{23}\text{N}_2\text{O}_5$ : 335.1607, found: 335.1607;  $[\alpha]_{\text{D}}^{22} +52^\circ$  ( $c$  0.17, MeOH).

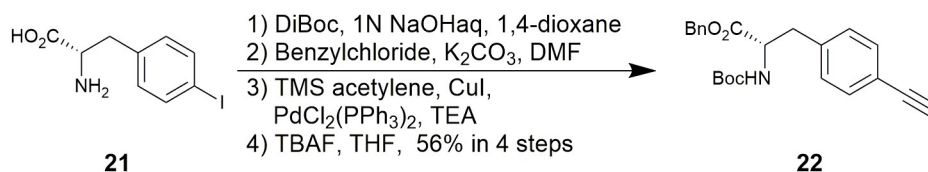

**Benzyl (S)-2-((tert-butoxycarbonyl)amino)-3-(4-ethynylphenyl)propanoate (**22**)**

To a solution of 4-iodo-L-Phenylalanine (**21**) [*cas.*: 24250-85-9] in 1,4-dioxane (1.5 mL) was added Di-*tert*-butyl dicarbonate (54.8  $\mu\text{L}$ , 0.238 mmol) and 1 N aqueous NaOH (3 mL) at room temperature nitrogen argon atmosphere. After the reaction mixture was stirred for 1.0 h, the reaction mixture was quenched with 1N aqueous hydrochloride (30mL). The mixture was extracted with EtOAc ( $3 \times 10$  mL) and brine washed. The organic layer was dried over  $\text{Na}_2\text{SO}_4$ , and filtered. After evaporation, the solution of the residue in DMF (5.0 mL) was added the benzylchloride (32  $\mu\text{L}$ , 0.277 mmol) and  $\text{K}_2\text{CO}_3$  (32.8 mg, 0.237 mmol) at room temperature under nitrogen atmosphere. After the reaction was stirred for 3.0 h, the reaction mixture was quenched with  $\text{H}_2\text{O}$  (40 mL). The mixture was extracted with EtOAc ( $3 \times 25$  mL) and brine washed. The organic layer was dried over  $\text{Na}_2\text{SO}_4$ , and filtered.

After evaporation, the solution of the residue in TEA (5.0 mL) was added Bis(triphenylphosphine)palladium(II) dichloride (3.9 mg, 0.495 mmol), copper(I) iodide (2.2 mg, 11.5 $\mu\text{mol}$ ) and trimethylsilylacetylene (70  $\mu\text{L}$ , 0.495 mmol) at room temperature under nitrogen atmosphere. After the reaction mixture was stirred for 12.0 h, the reaction mixture was quenched with  $\text{H}_2\text{O}$ . The mixture was extracted EtOAc ( $3 \times 25$  mL) and brine washed. The organic layer was dried over  $\text{Na}_2\text{SO}_4$ , and filtered. After evaporation, the residue was purified by silica gel column chromatography (tolene/EtOAc = 50/1).

Each solution was concentrated by evaporation gave mixture compound. To a solution of the residue in THF (3.0 mL) was added 1M TBAF in THF solution (0.3 mL) at  $-78^\circ\text{C}$  under nitrogen atmosphere. After the reaction mixture was stirred for 2.0 h, the reaction mixture was quenched with  $\text{H}_2\text{O}$ . The mixture was extracted with EtOAc ( $3 \times 5$  mL) and brine washed. The organic layer was dried over  $\text{Na}_2\text{SO}_4$ , and filtered. After evaporation, the residue was purified by silica gel column chromatography (*n*-hexane/EtOAc = 7/1). Each solution was concentrated by evaporation gave **22** (53.3 mg, 0.140 mmol, 56%) as a white crystalline solid.

$^1\text{H-NMR}$  (400MHz,  $\text{CDCl}_3$ )  $\delta_{\text{H}}$  7.38-7.32 (m, 5H), 7.28-7.24 (m, 2H), 6.98 (d,  $J = 7.6$ , 2H), 5.12 (m, 2H), 4.97 (d,  $J = 7.2$ , 1H), 4.62 (dt,  $J = 7.2$ , 5.6, 1H), 3.12-3.00 (m, 3H), 1.42 (s, 9H);  $^{13}\text{C-NMR}$  (100MHz,  $\text{CDCl}_3$ )  $\delta_{\text{C}}$ : 171.5, 155.0, 136.9, 135.1, 132.3 (2C), 130.8, 129.4 (2C), 128.7 (2C), 128.6 (2C), 120.8, 83.4, 80.1, 77.3, 67.3, 54.3, 38.2,

*Supporting Information for Egoshi, Takaoka, Saito, Nukadzuka, Hayashi, Ishimaru, Yamakoshi, Dodo, Sodeoka and Ueda; Dual function of coronatine as a bacterial virulence factor against plants: possible COII-JAZ-independent role.*

28.3(3C); IR (film)  $\text{cm}^{-1}$ : 3292, 2978, 2933, 2107, 1741, 1712, 1499, 1455, 1366, 1250, 1164, 1056, 1020, 825; HRMS (ESI, positive)  $m/z$   $[\text{M}+\text{Na}]^+$  calcd. for  $\text{C}_{23}\text{H}_{26}\text{NO}_4\text{Na}$ : 402.1681, found: 402.1707.

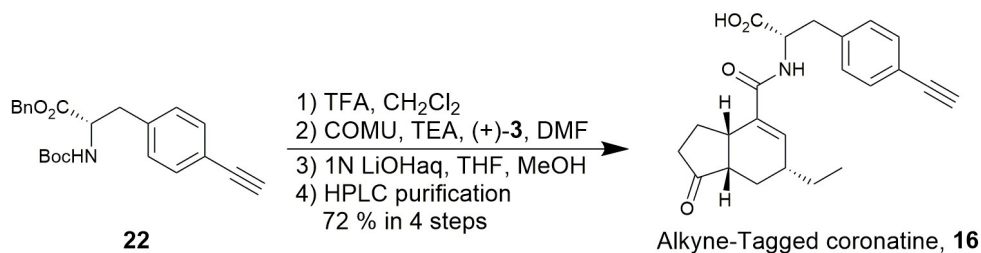

#### Alkyne-Tagged coronatine (**16**)

To a solution of **21** (38.0 mg, 100  $\mu$ mol) in CH<sub>2</sub>Cl<sub>2</sub> (0.75 mL) was added TFA (0.25 mL) at room temperature under argon atmosphere. After the reaction mixture was stirred for 1.0 h, the reaction mixture was quenched with saturated aqueous NaHCO<sub>3</sub> (10 mL). The mixture was extracted with EtOAc (3  $\times$  10 mL) and brine washed. The organic layer was dried over Na<sub>2</sub>SO<sub>4</sub>, and filtered. After evaporation, to a solution of the residue in DMF (0.5 mL) was added CFA (5.0 mg, 24  $\mu$ mol), COMU (15.8 mg, 39.2  $\mu$ mol) and TEA (14.5 mg, 143  $\mu$ mol) at room temperature under argon atmosphere.. After the reaction mixture was stirred for 2.5 h, the mixture was quenched with 1N aqueous hydrochloride (10 mL). The mixture was extracted with EtOAc (3  $\times$  5 mL). The organic layer was dried over Na<sub>2</sub>SO<sub>4</sub>, and filtered. After evaporation, the residue was purified by silica gel column chromatography (*n*-hexane/EtOAc = 3/1). Each solution was concentrated by evaporation gave the residue (9.4 mg, 20  $\mu$ mol, 83%).

To a solution of the residue (3.7 mg, 7.88  $\mu$ mol) in MeOH (0.3 mL) was added 1N aqueous LiOH (0.3 mL). After the reaction mixture was stirred for 20 min, the reaction mixture was quenched with 1N aqueous hydrochloride. The mixture was extracted with EtOAc (3  $\times$  5 mL). The organic layer was dried over Na<sub>2</sub>SO<sub>4</sub>, and filtered. After evaporation, the residue was purified by HPLC on silica gel column (COSMOSIL SC<sub>18</sub>-AR, 10  $\times$  250 mm, Nacalai Tesque co., ltd.) with 0.05% TFA solution (CH<sub>3</sub>CN / aqueous = 55 / 45) at 3.0 mL/min to give **16** (R<sub>t</sub> = 62-65 min), respectively. Each solution was concentrated by evaporation gave **16** (2.6 mg, 6.85  $\mu$ mol, 87%) as a colorless crystalline solid.

<sup>1</sup>H-NMR (400MHz, CD<sub>3</sub>OD)  $\delta$ <sub>H</sub>: 7.38 (d, *J* = 7.6 Hz, 2H), 7.24 (d, *J* = 7.6 Hz, 2H), 6.28 (s, 1H), 4.70 (dd, *J* = 10.0, 4.4 Hz, 1H), 3.42 (s, 1H), 3.22-3.02 (m, 3H), 2.36-2.21 (m, 3H), 2.16-2.05 (m, 2H), 1.76 (dt, *J* = 12.8, 5.2 Hz, 1H), 1.54-1.33 (m, 3H), 1.08 (dt, *J* = 12.8, 11.2 Hz, 1H), 0.98 (t, *J* = 7.2 Hz, 3H); <sup>13</sup>C-NMR (100MHz, CD<sub>3</sub>OD)  $\delta$ <sub>C</sub>: 222.8, 174.6, 1671.1, 139.9, 138.5, 136.3, 133.1 (2C), 130.4 (2C), 122.3, 84.1, 78.6, 54.9, 47.7, 38.7, 38.5, 37.8, 37.2, 29.0, 28.5, 27.1, 11.6; IR (film) cm<sup>-1</sup>: 3292, 2962, 2932, 2875, 2017, 1735, 1655, 1614, 1509, 1444, 1404, 1214, 1148, 1068, 827; HRMS (ESI, negative) *m/z* [M-H]<sup>-</sup> calcd. for C<sub>23</sub>H<sub>24</sub>NO<sub>4</sub>: 378.1705, found: 378.1705; [ $\alpha$ ]<sub>D</sub><sup>23</sup> +85° (*c*



*Supporting Information for Egoshi, Takaoka, Saito, Nukadzuka, Hayashi, Ishimaru, Yamakoshi, Dodo, Sodeoka and Ueda; Dual function of coronatine as a bacterial virulence factor against plants: possible COI1-JAZ-independent role.*

0.10, CHCl<sub>3</sub>);

## $^1\text{H}$ and $^{13}\text{C}$ NMR Spectra

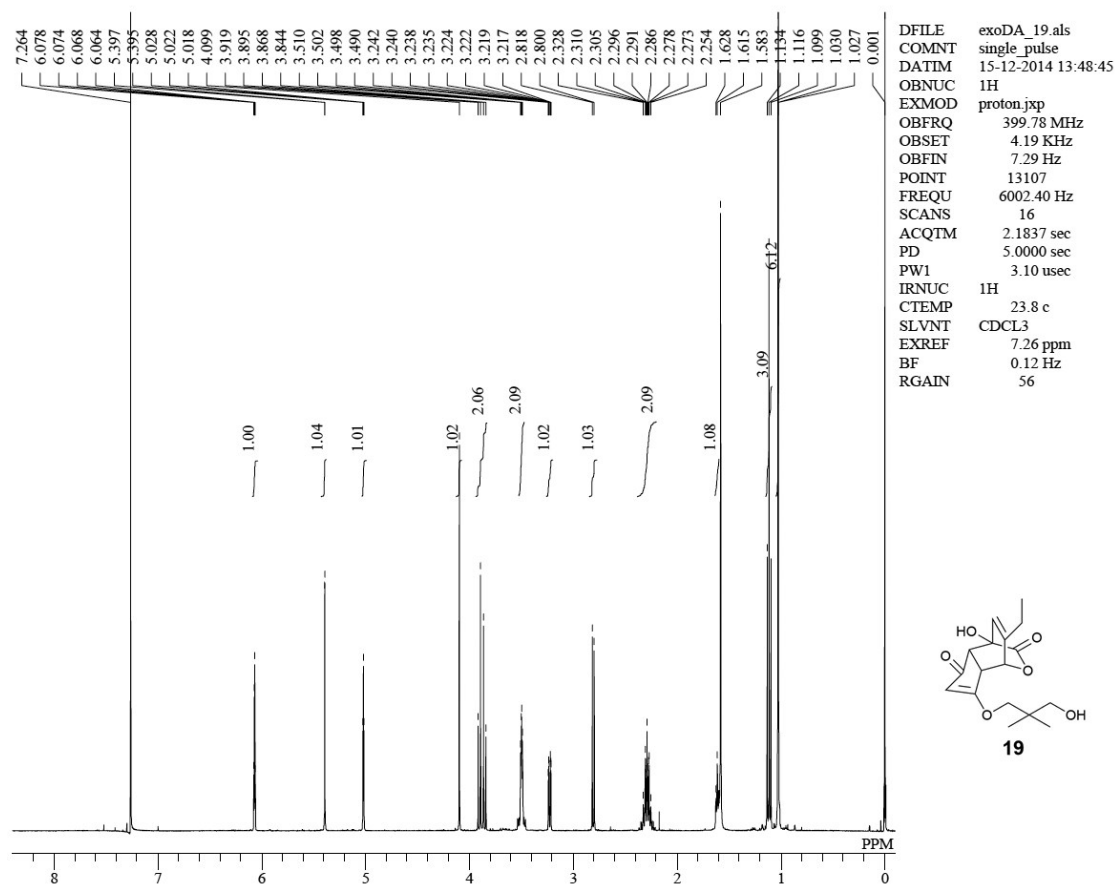

*Supporting Information for Egoshi, Takaoka, Saito, Nukadzuka, Hayashi, Ishimaru, Yamakoshi, Dodo, Sodeoka and Ueda; Dual function of coronatine as a bacterial virulence factor against plants: possible COI1-JAZ-independent role.*

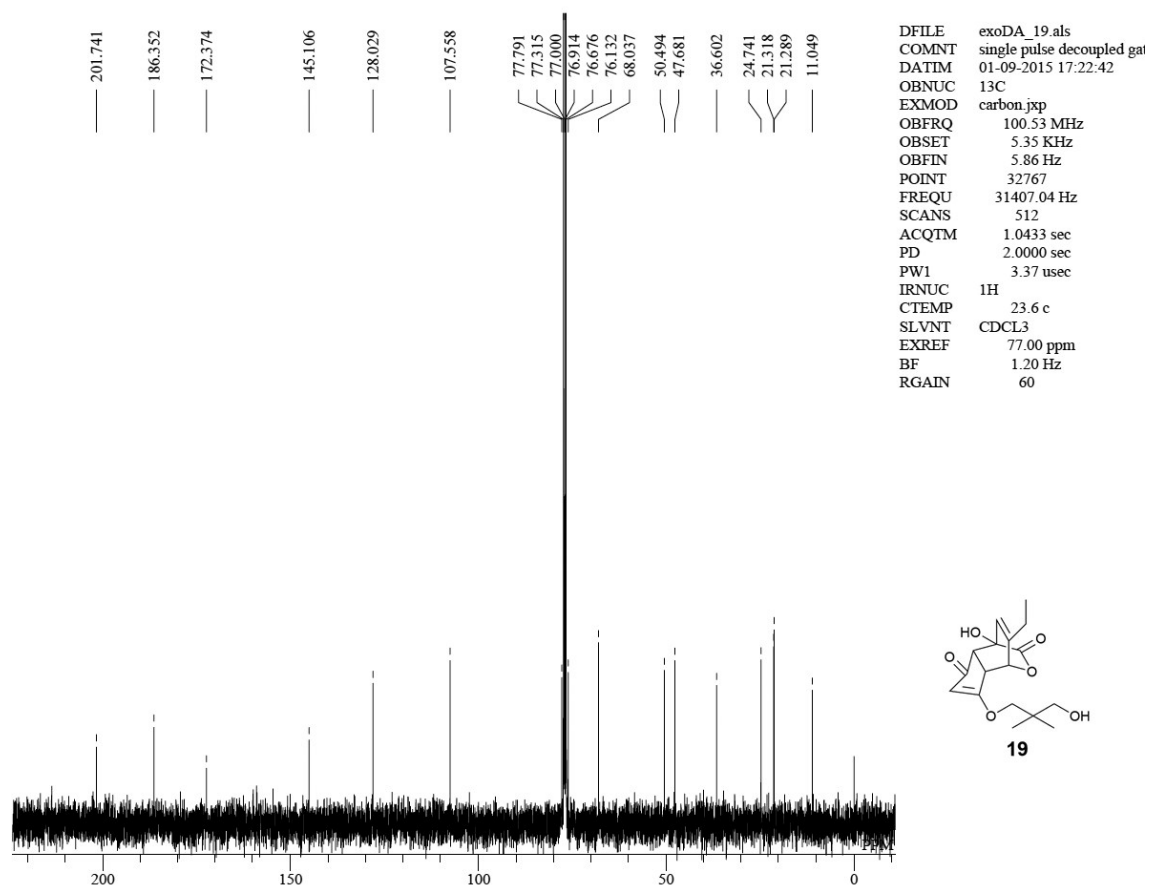

Supporting Information for Egoshi, Takaoka, Saito, Nukadzuka, Hayashi, Ishimaru, Yamakoshi, Dodo, Sodeoka and Ueda; Dual function of coronatine as a bacterial virulence factor against plants: possible COI1-JAZ-independent role.

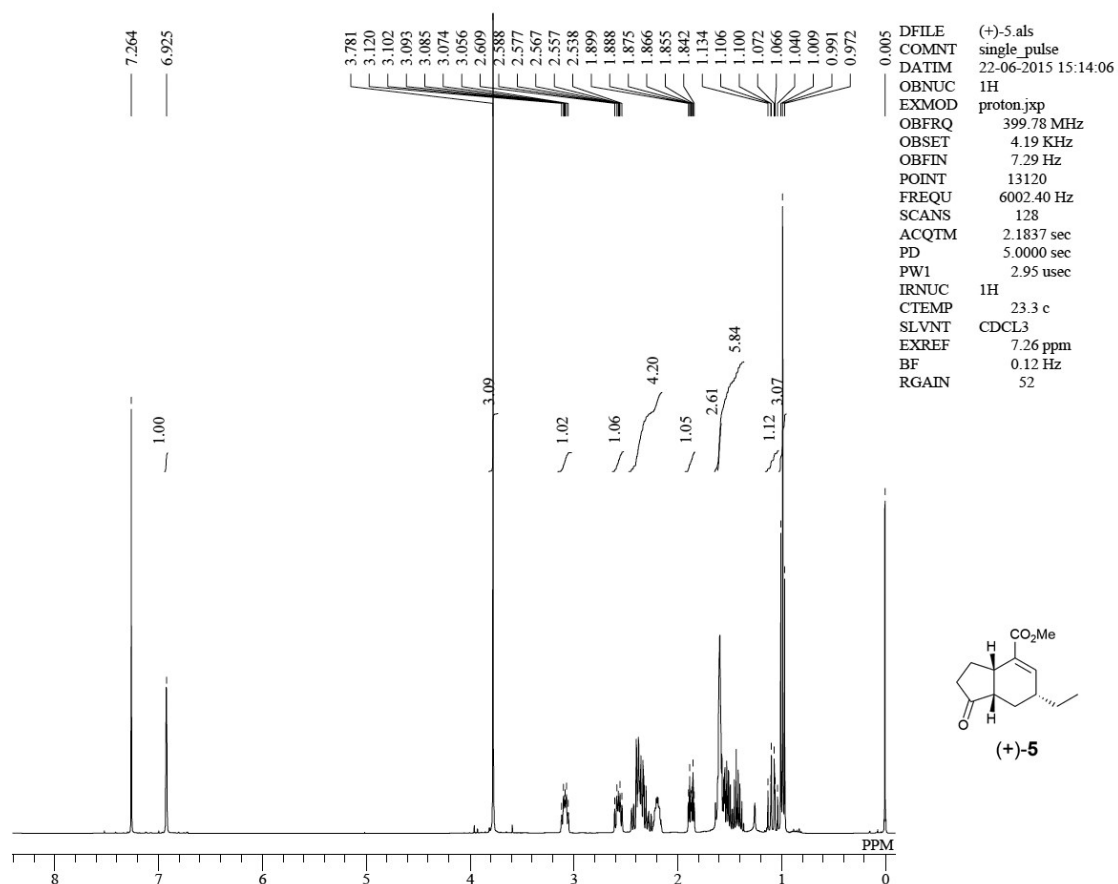

Supporting Information for Egoshi, Takaoka, Saito, Nukadzuka, Hayashi, Ishimaru, Yamakoshi, Dodo, Sodeoka and Ueda; Dual function of coronatine as a bacterial virulence factor against plants: possible COI1-JAZ-independent role.

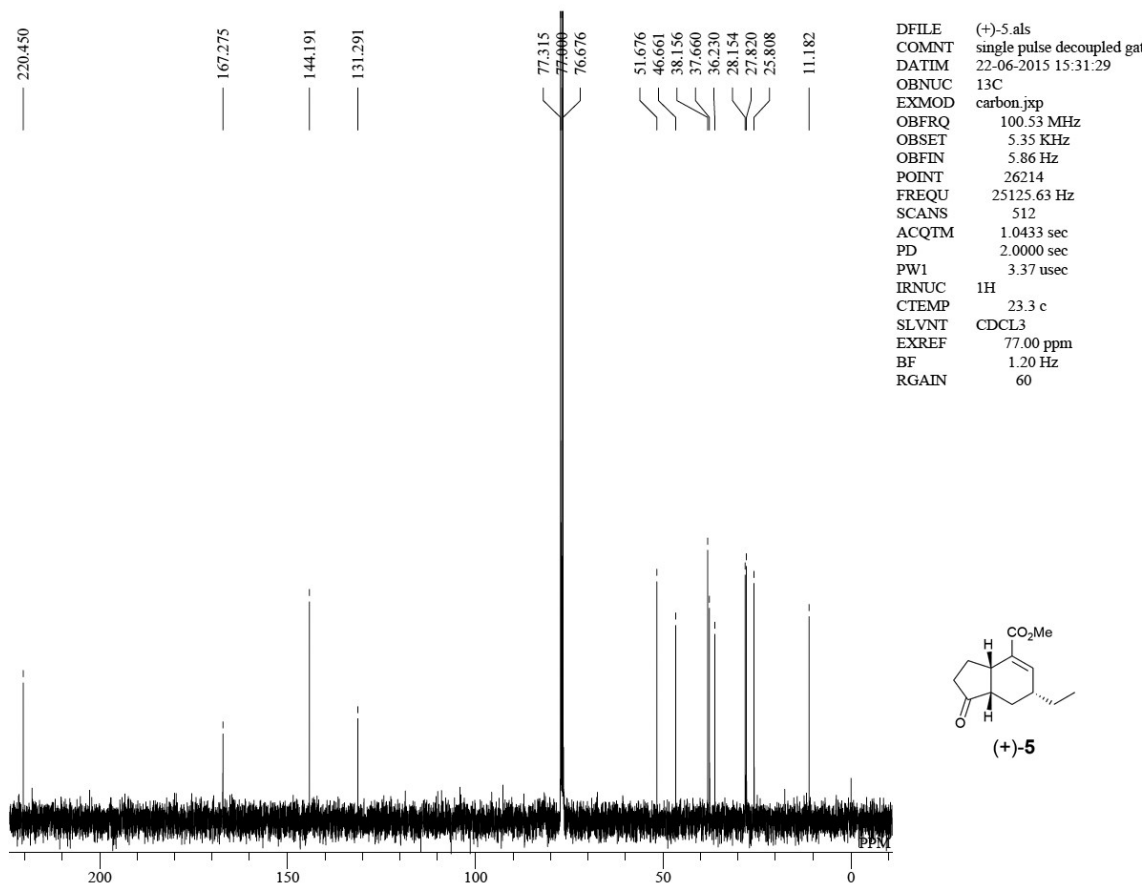



Supporting Information for Egoshi, Takaoka, Saito, Nukadzuka, Hayashi, Ishimaru, Yamakoshi, Dodo, Sodeoka and Ueda; Dual function of coronatine as a bacterial virulence factor against plants: possible COII-JAZ-independent role.

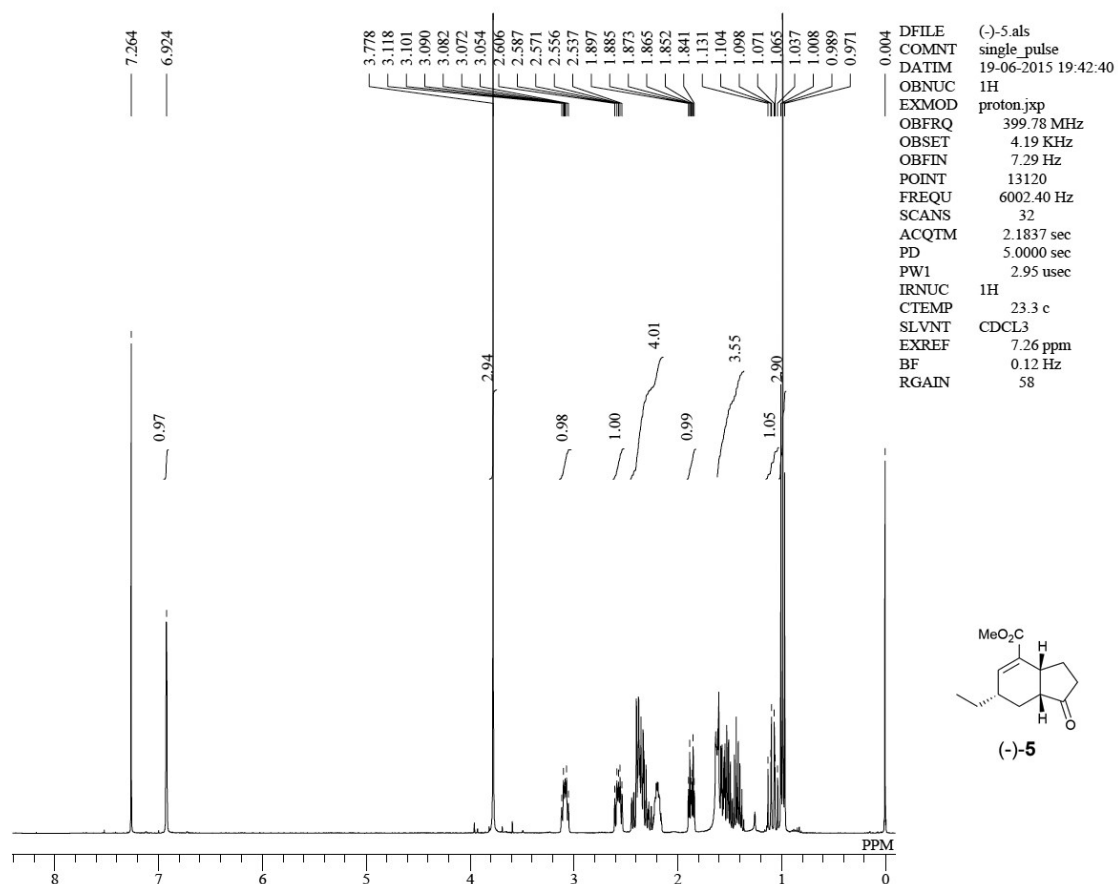

Supporting Information for Egoshi, Takaoka, Saito, Nukadzuka, Hayashi, Ishimaru, Yamakoshi, Dodo, Sodeoka and Ueda; Dual function of coronatine as a bacterial virulence factor against plants: possible COI1-JAZ-independent role.

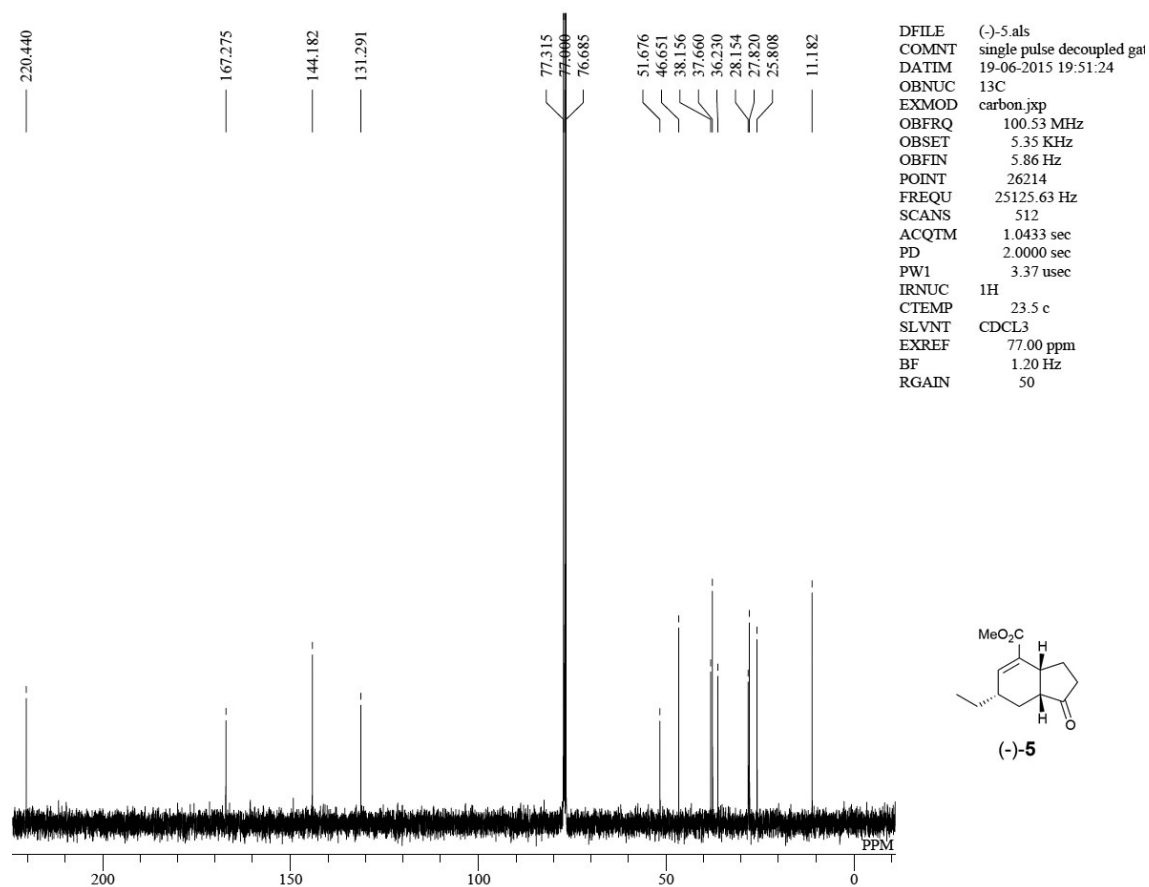

Supporting Information for Egoshi, Takaoka, Saito, Nukadzuka, Hayashi, Ishimaru, Yamakoshi, Dodo, Sodeoka and Ueda; Dual function of coronatine as a bacterial virulence factor against plants: possible COI1-JAZ-independent role.

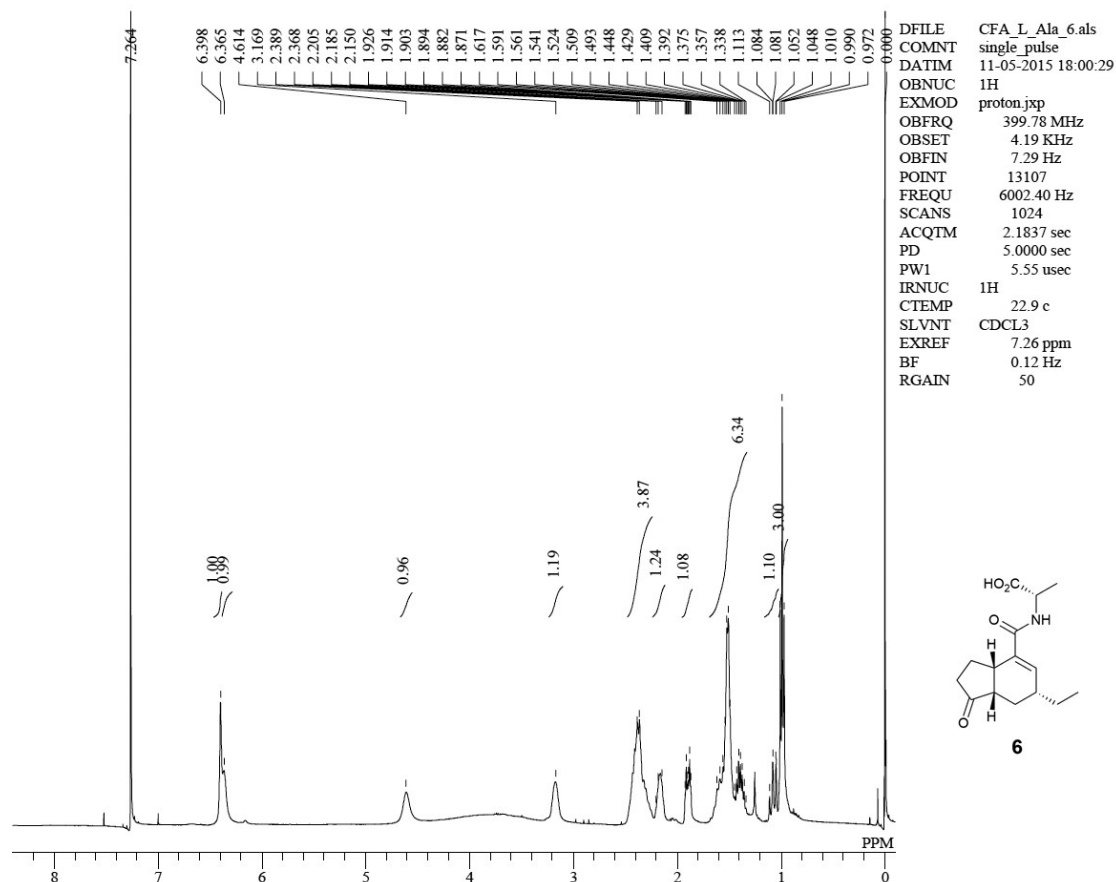

Supporting Information for Egoshi, Takaoka, Saito, Nukadzuka, Hayashi, Ishimaru, Yamakoshi, Dodo, Sodeoka and Ueda; Dual function of coronatine as a bacterial virulence factor against plants: possible COI1-JAZ-independent role.

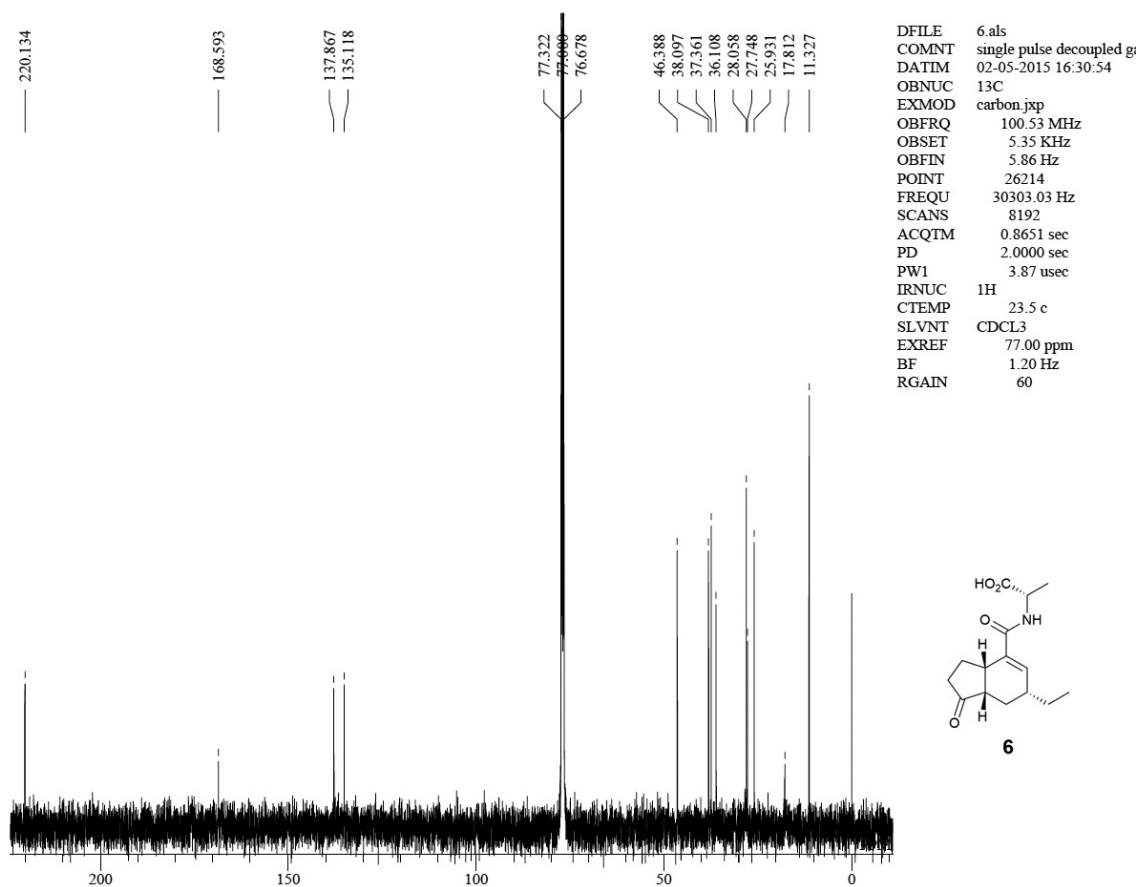

Supporting Information for Egoshi, Takaoka, Saito, Nukadzuka, Hayashi, Ishimaru, Yamakoshi, Dodo, Sodeoka and Ueda; Dual function of coronatine as a bacterial virulence factor against plants: possible COII-JAZ-independent role.

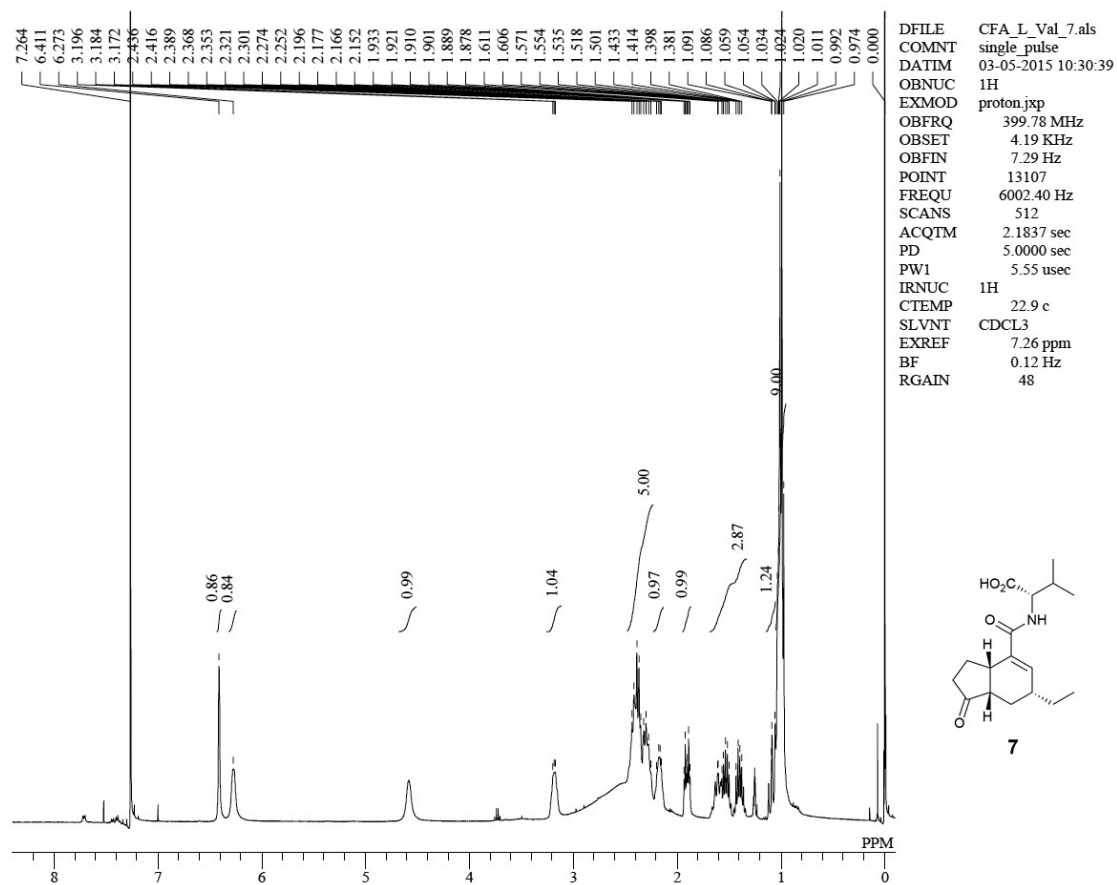

Supporting Information for Egoshi, Takaoka, Saito, Nukadzuka, Hayashi, Ishimaru, Yamakoshi, Dodo, Sodeoka and Ueda; Dual function of coronatine as a bacterial virulence factor against plants: possible COI1-JAZ-independent role.

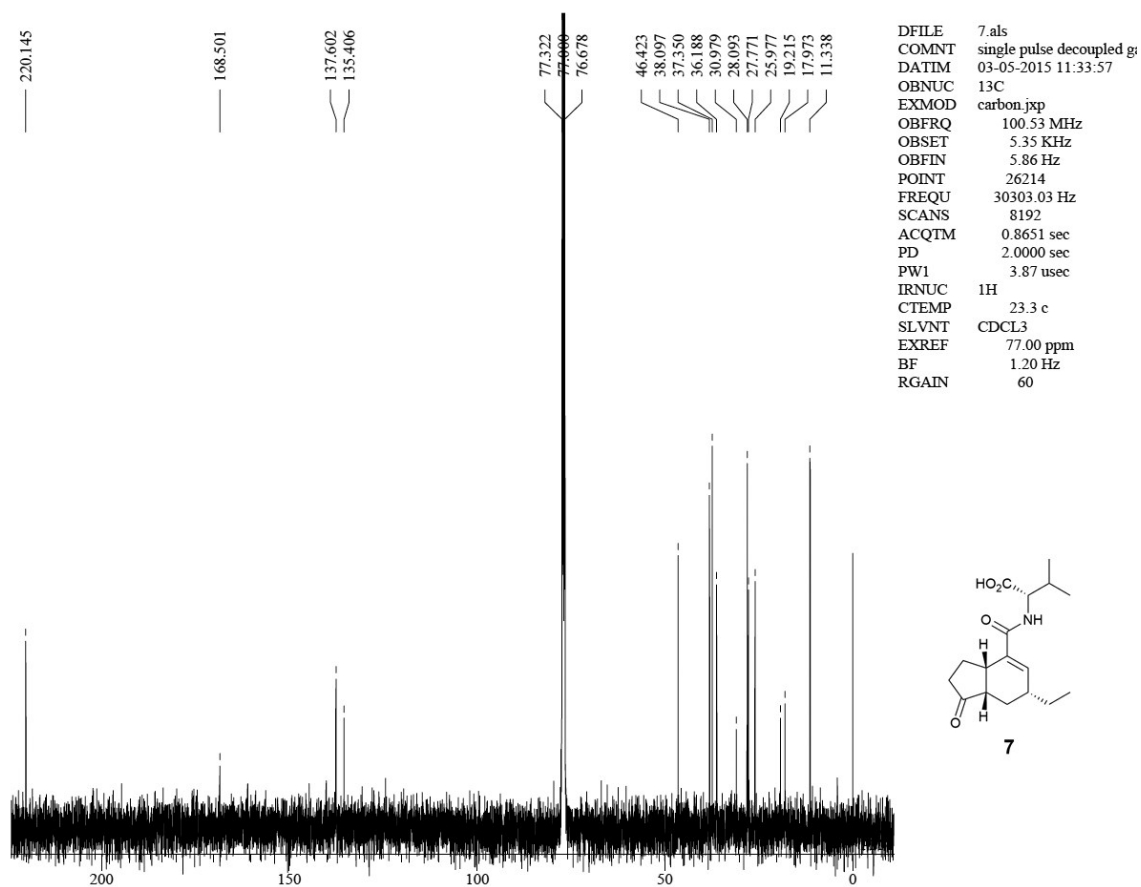

Supporting Information for Egoshi, Takaoka, Saito, Nukadzuka, Hayashi, Ishimaru, Yamakoshi, Dodo, Sodeoka and Ueda; Dual function of coronatine as a bacterial virulence factor against plants: possible COII-JAZ-independent role.

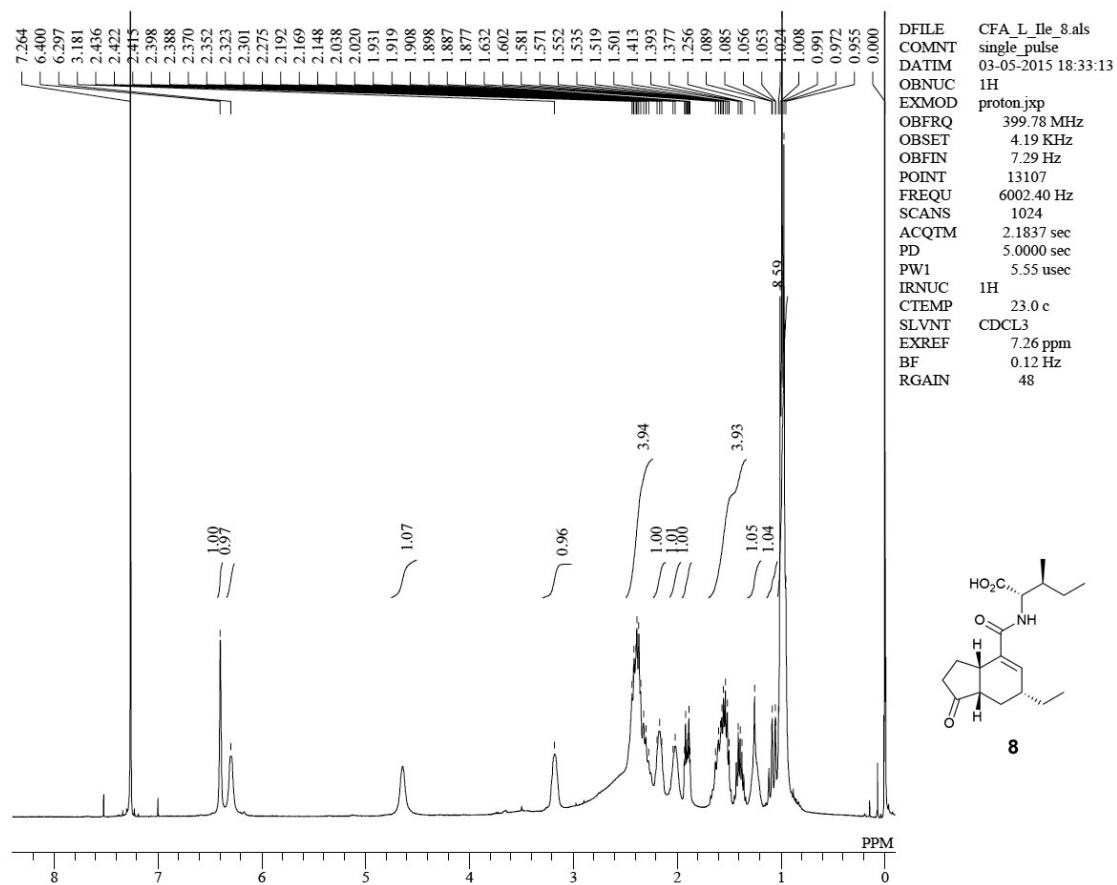

Supporting Information for Egoshi, Takaoka, Saito, Nukadzuka, Hayashi, Ishimaru, Yamakoshi, Dodo, Sodeoka and Ueda; Dual function of coronatine as a bacterial virulence factor against plants: possible COI1-JAZ-independent role.

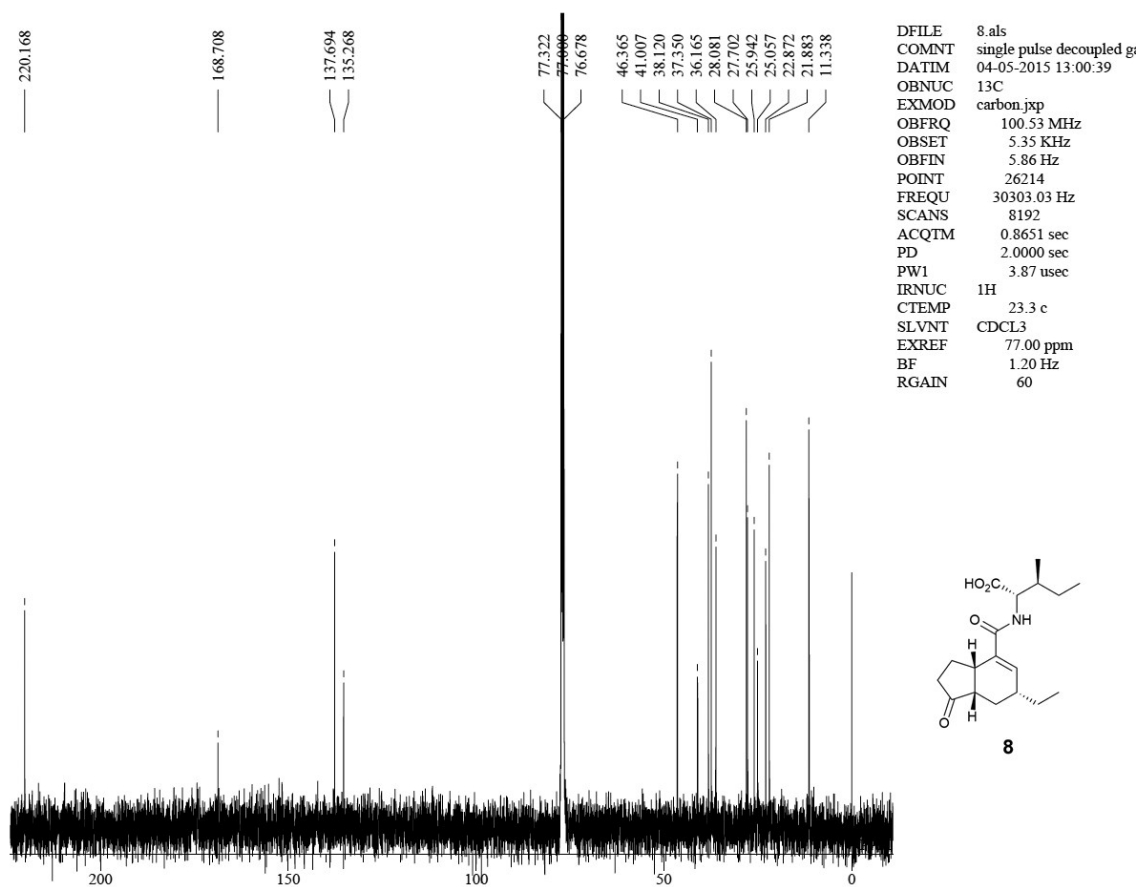



Supporting Information for Egoshi, Takaoka, Saito, Nukadzuka, Hayashi, Ishimaru, Yamakoshi, Dodo, Sodeoka and Ueda; Dual function of coronatine as a bacterial virulence factor against plants: possible COII-JAZ-independent role.

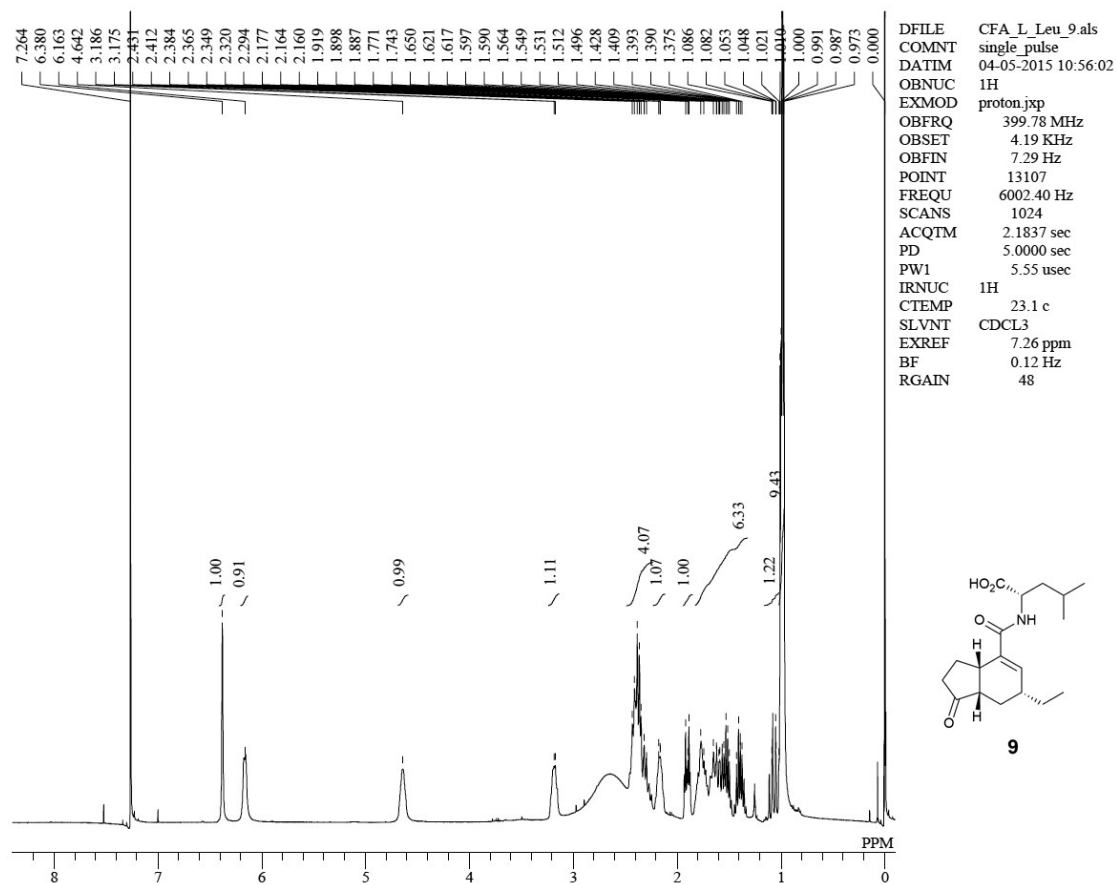

Supporting Information for Egoshi, Takaoka, Saito, Nukadzuka, Hayashi, Ishimaru, Yamakoshi, Dodo, Sodeoka and Ueda; Dual function of coronatine as a bacterial virulence factor against plants: possible COI1-JAZ-independent role.

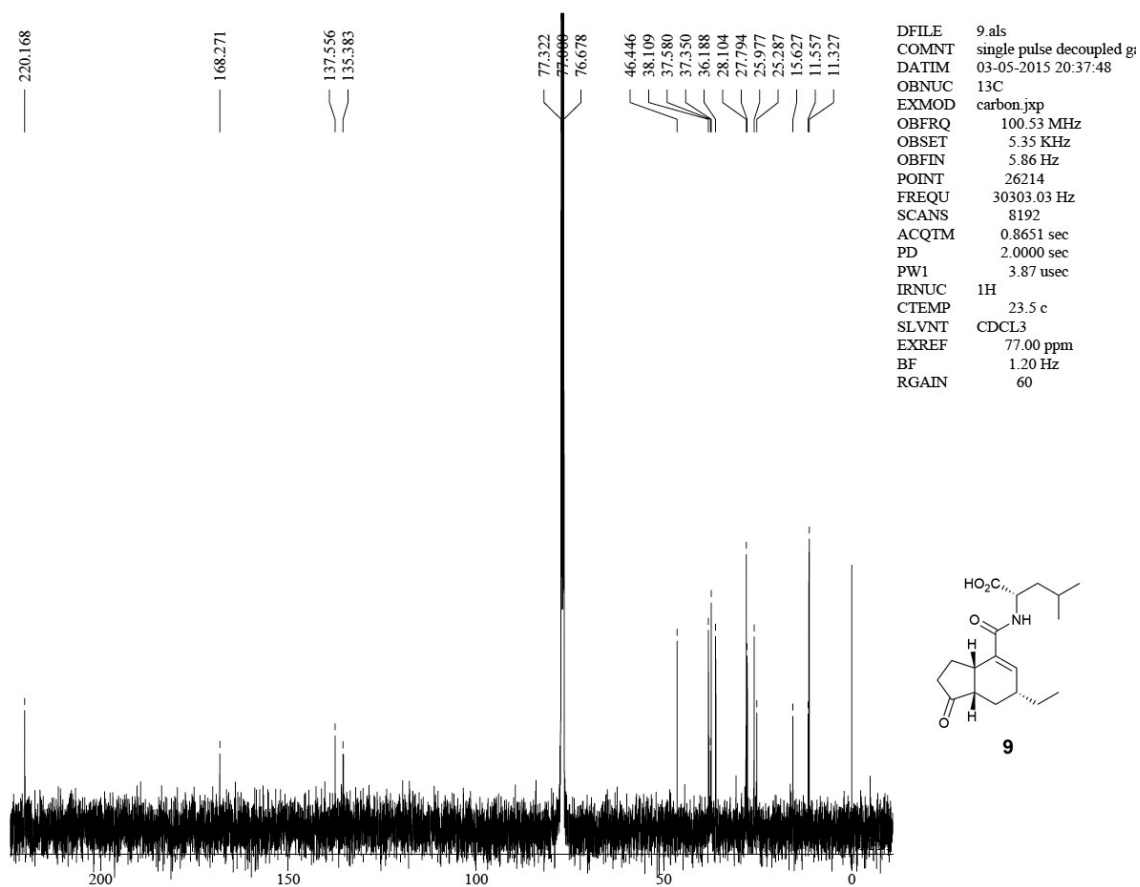

Supporting Information for Egoshi, Takaoka, Saito, Nukadzuka, Hayashi, Ishimaru, Yamakoshi, Dodo, Sodeoka and Ueda; Dual function of coronatine as a bacterial virulence factor against plants: possible COII-JAZ-independent role.

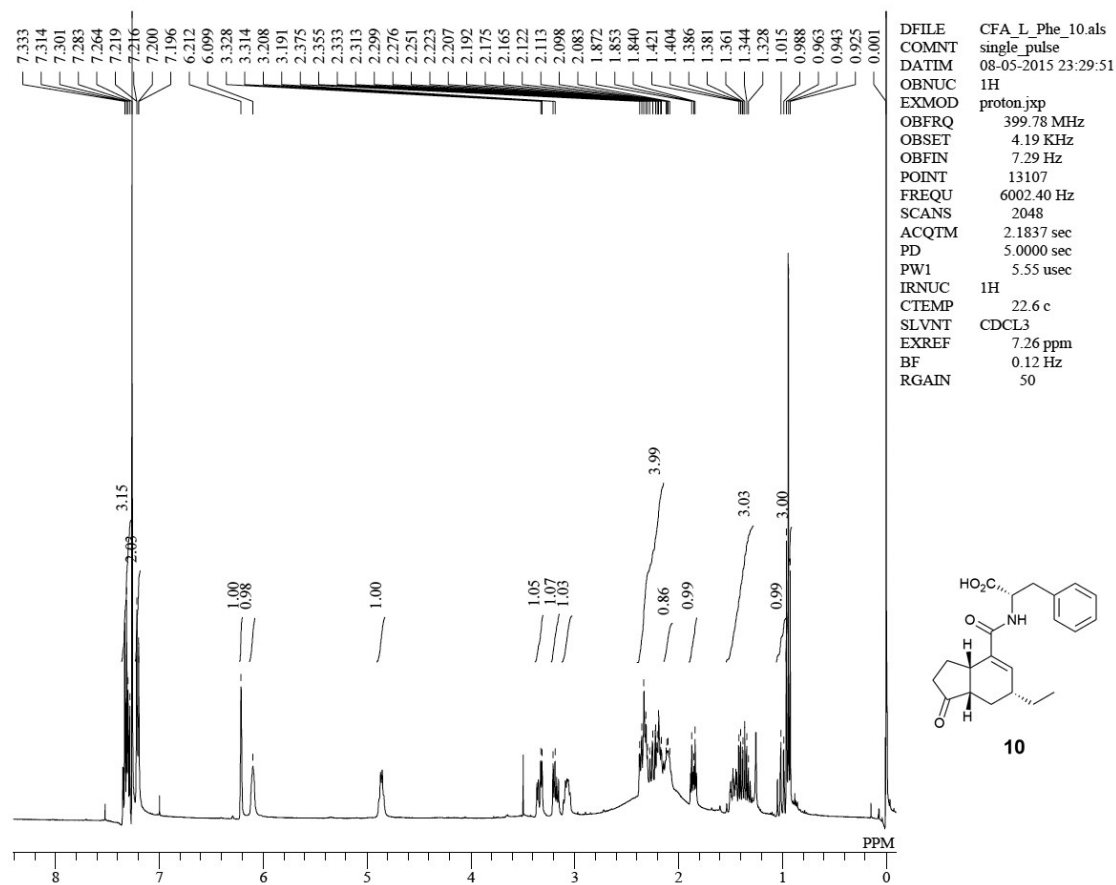

*Supporting Information for Egoshi, Takaoka, Saito, Nukadzuka, Hayashi, Ishimaru, Yamakoshi, Dodo, Sodeoka and Ueda; Dual function of coronatine as a bacterial virulence factor against plants: possible COII-JAZ-independent role.*

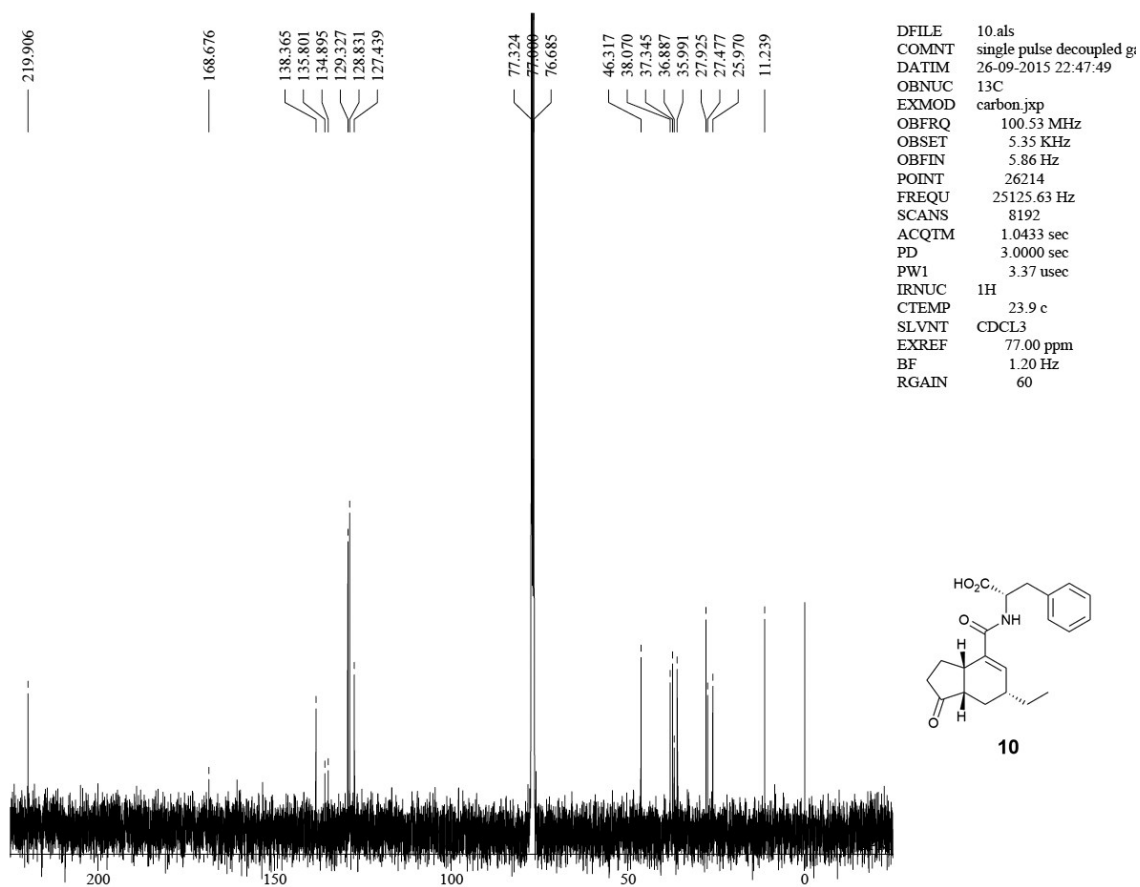

Supporting Information for Egoshi, Takaoka, Saito, Nukadzuka, Hayashi, Ishimaru, Yamakoshi, Dodo, Sodeoka and Ueda; Dual function of coronatine as a bacterial virulence factor against plants: possible COI1-JAZ-independent role.

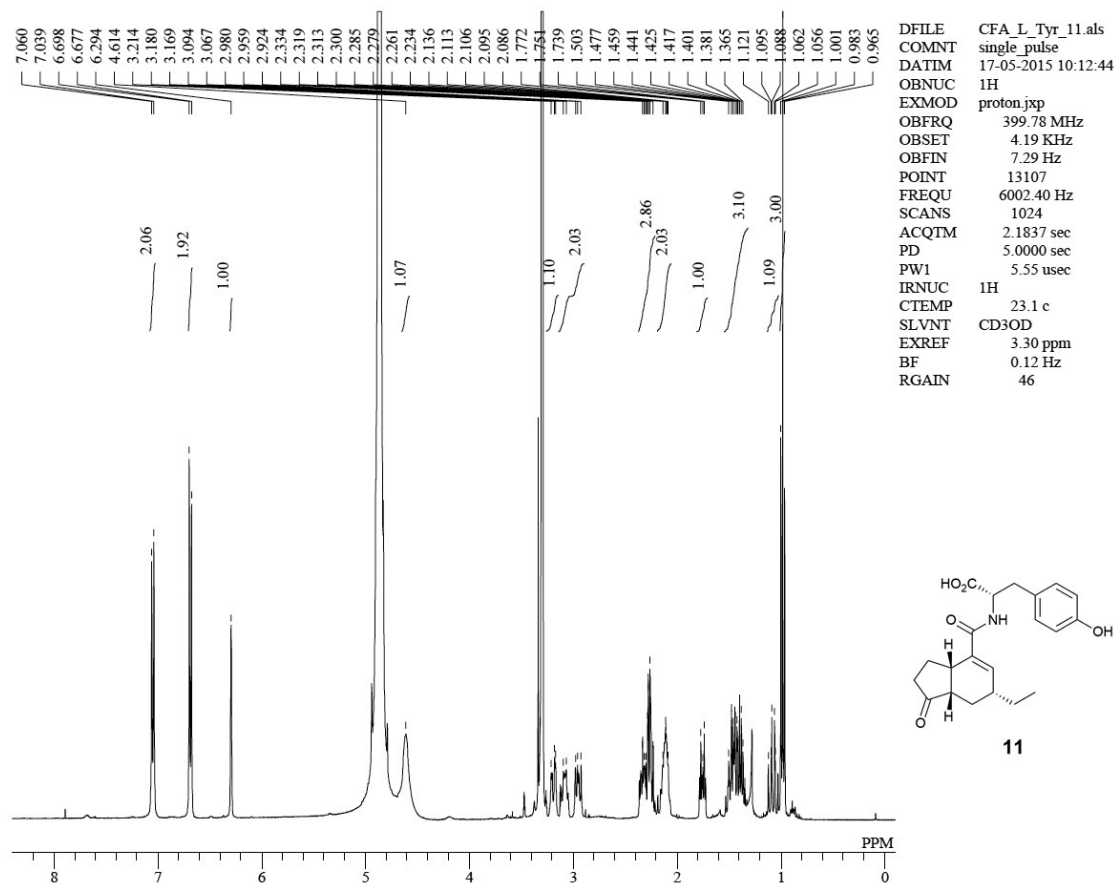

*Supporting Information for Egoshi, Takaoka, Saito, Nukadzuka, Hayashi, Ishimaru, Yamakoshi, Dodo, Sodeoka and Ueda; Dual function of coronatine as a bacterial virulence factor against plants: possible COI1-JAZ-independent role.*

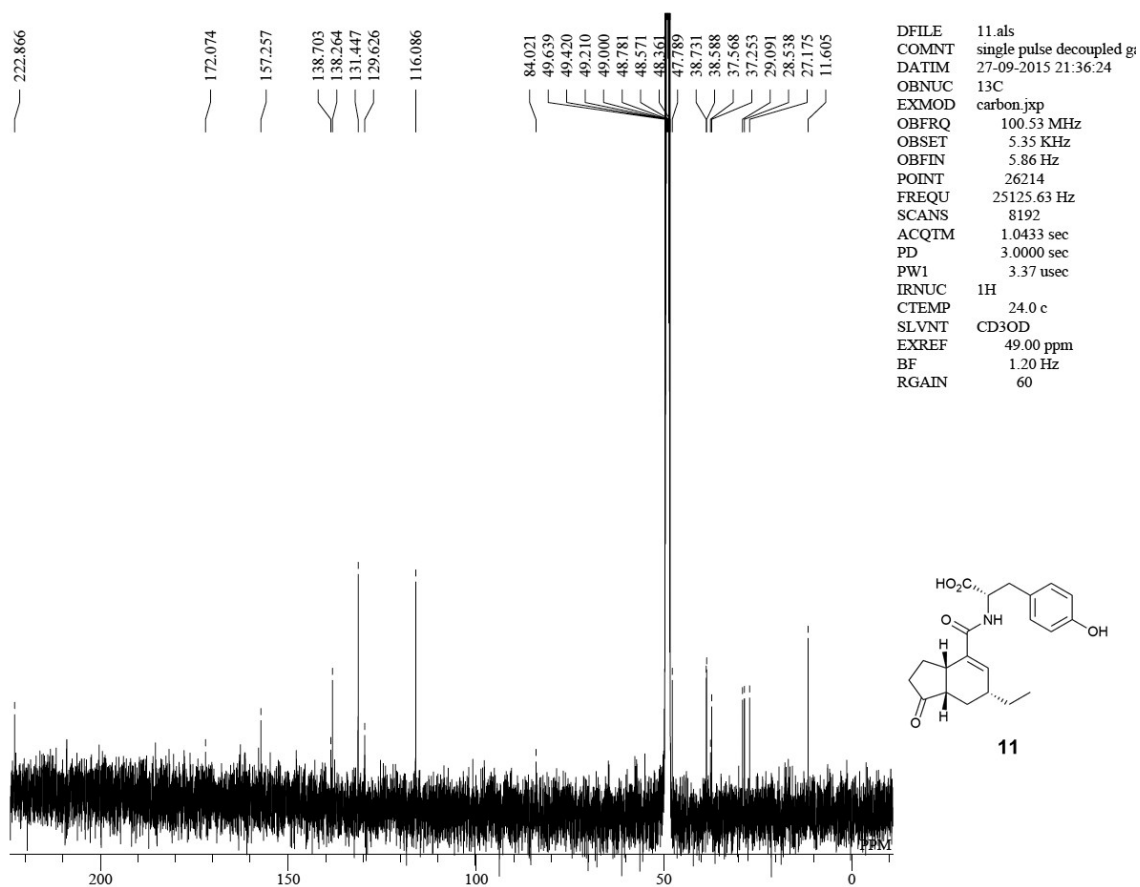

Supporting Information for Egoshi, Takaoka, Saito, Nukadzuka, Hayashi, Ishimaru, Yamakoshi, Dodo, Sodeoka and Ueda; Dual function of coronatine as a bacterial virulence factor against plants: possible COII-JAZ-independent role.

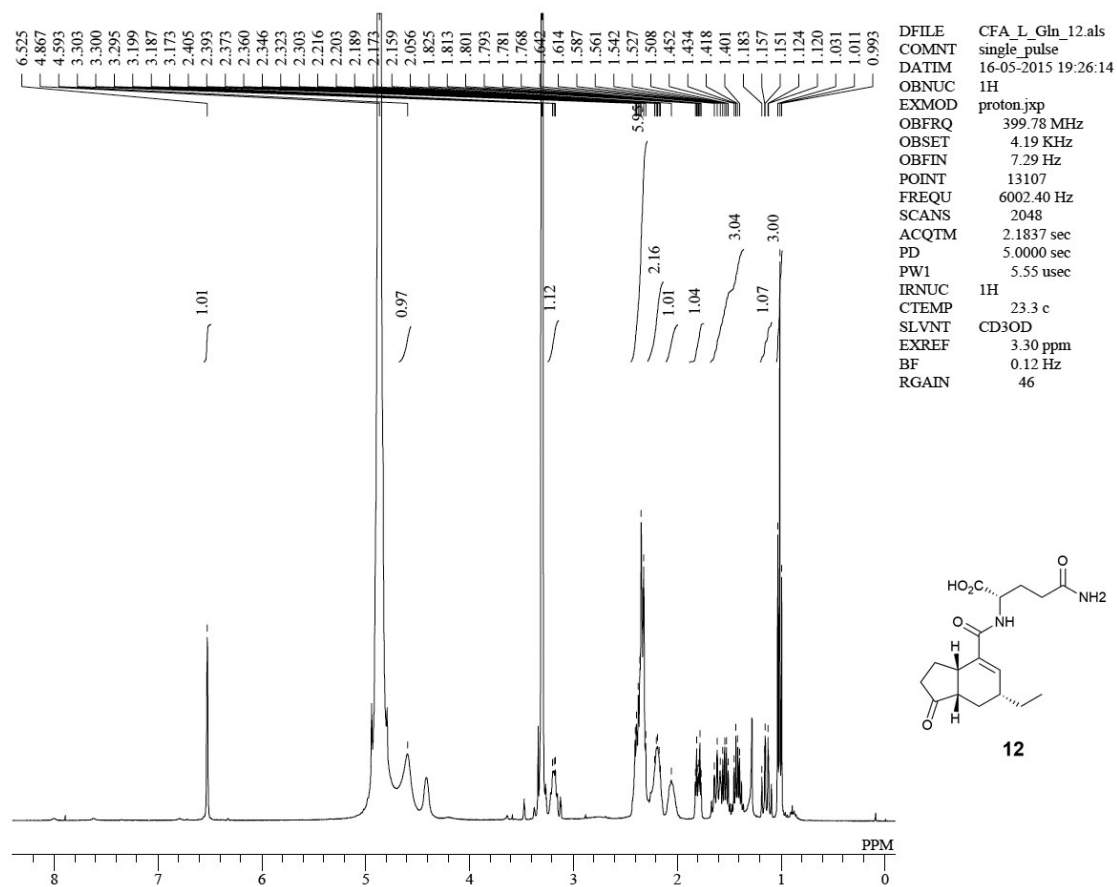

*Supporting Information for Egoshi, Takaoka, Saito, Nukadzuka, Hayashi, Ishimaru, Yamakoshi, Dodo, Sodeoka and Ueda; Dual function of coronatine as a bacterial virulence factor against plants: possible COI1-JAZ-independent role.*

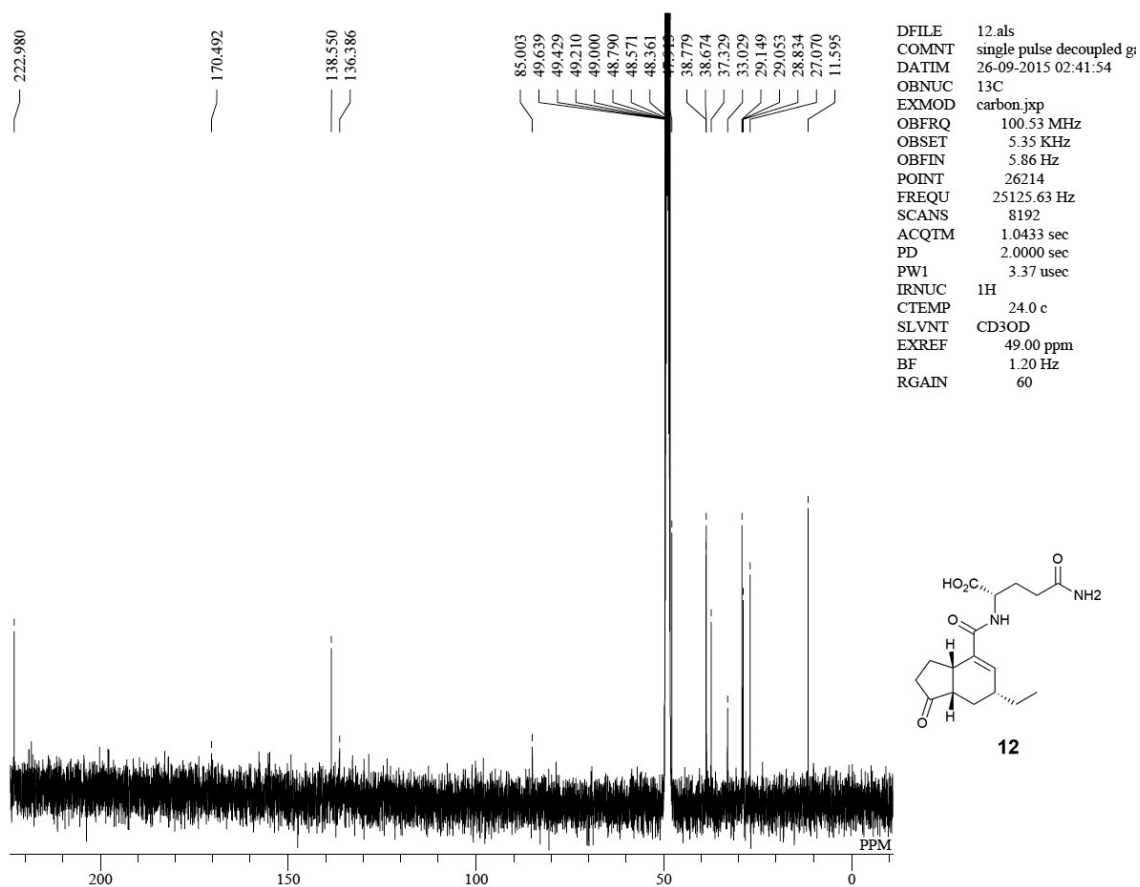



Supporting Information for Egoshi, Takaoka, Saito, Nukadzuka, Hayashi, Ishimaru, Yamakoshi, Dodo, Sodeoka and Ueda; Dual function of coronatine as a bacterial virulence factor against plants: possible COII-JAZ-independent role.

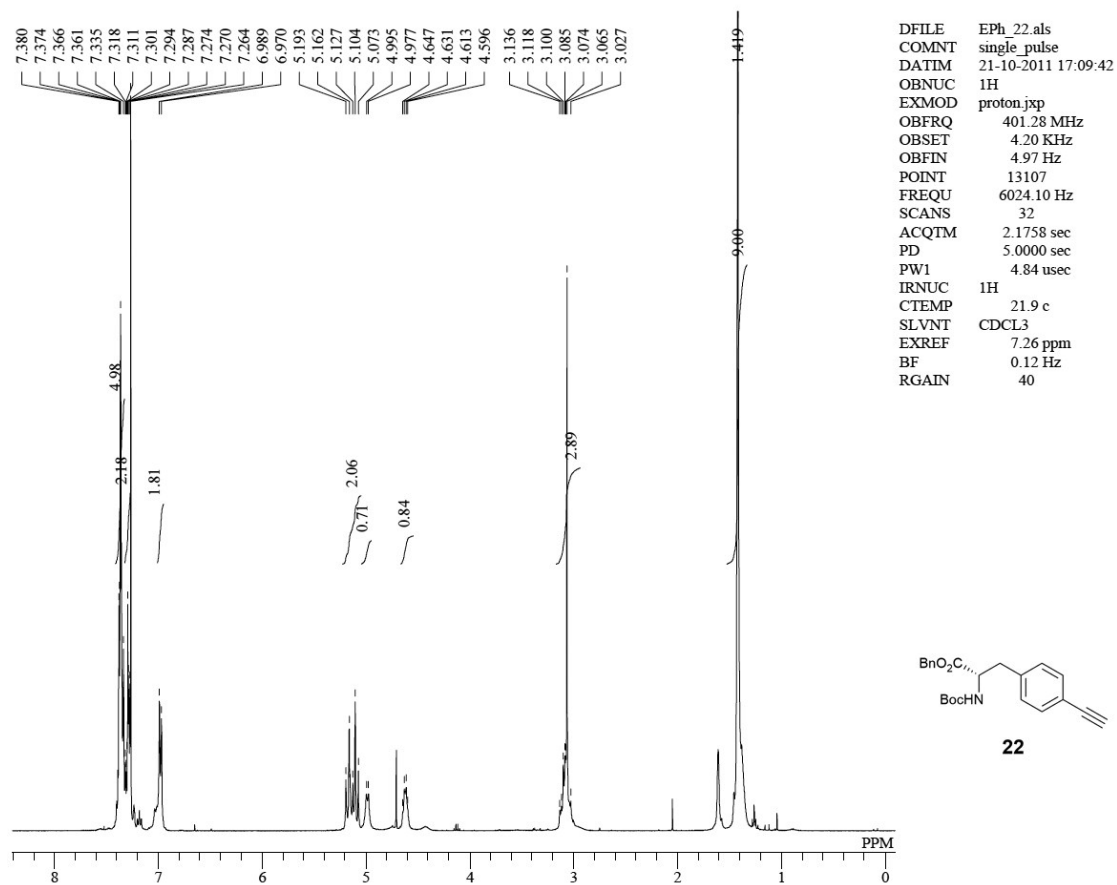

*Supporting Information for Egoshi, Takaoka, Saito, Nukadzuka, Hayashi, Ishimaru, Yamakoshi, Dodo, Sodeoka and Ueda; Dual function of coronatine as a bacterial virulence factor against plants: possible COI1-JAZ-independent role.*

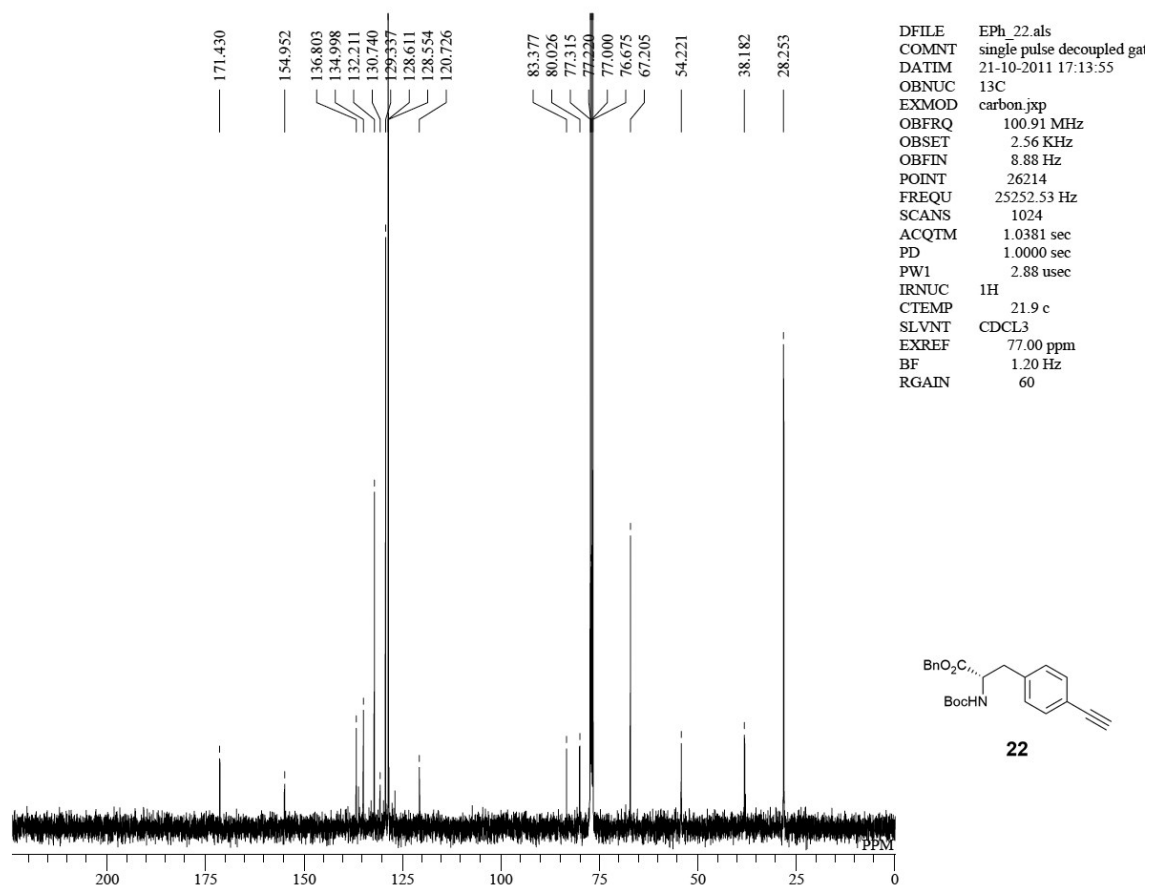

Supporting Information for Egoshi, Takaoka, Saito, Nukadzuka, Hayashi, Ishimaru, Yamakoshi, Dodo, Sodeoka and Ueda; Dual function of coronatine as a bacterial virulence factor against plants: possible COI1-JAZ-independent role.

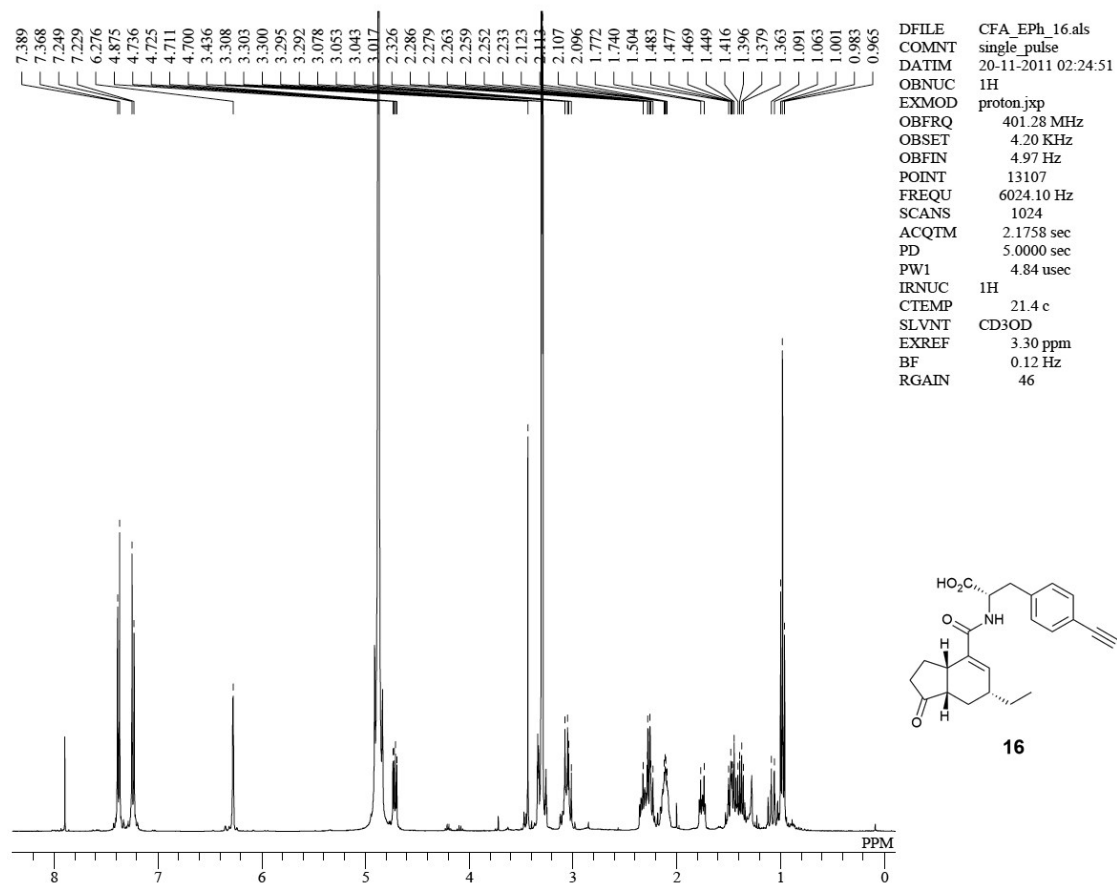

Supporting Information for Egoshi, Takaoka, Saito, Nukadzuka, Hayashi, Ishimaru, Yamakoshi, Dodo, Sodeoka and Ueda; Dual function of coronatine as a bacterial virulence factor against plants: possible COI1-JAZ-independent role.

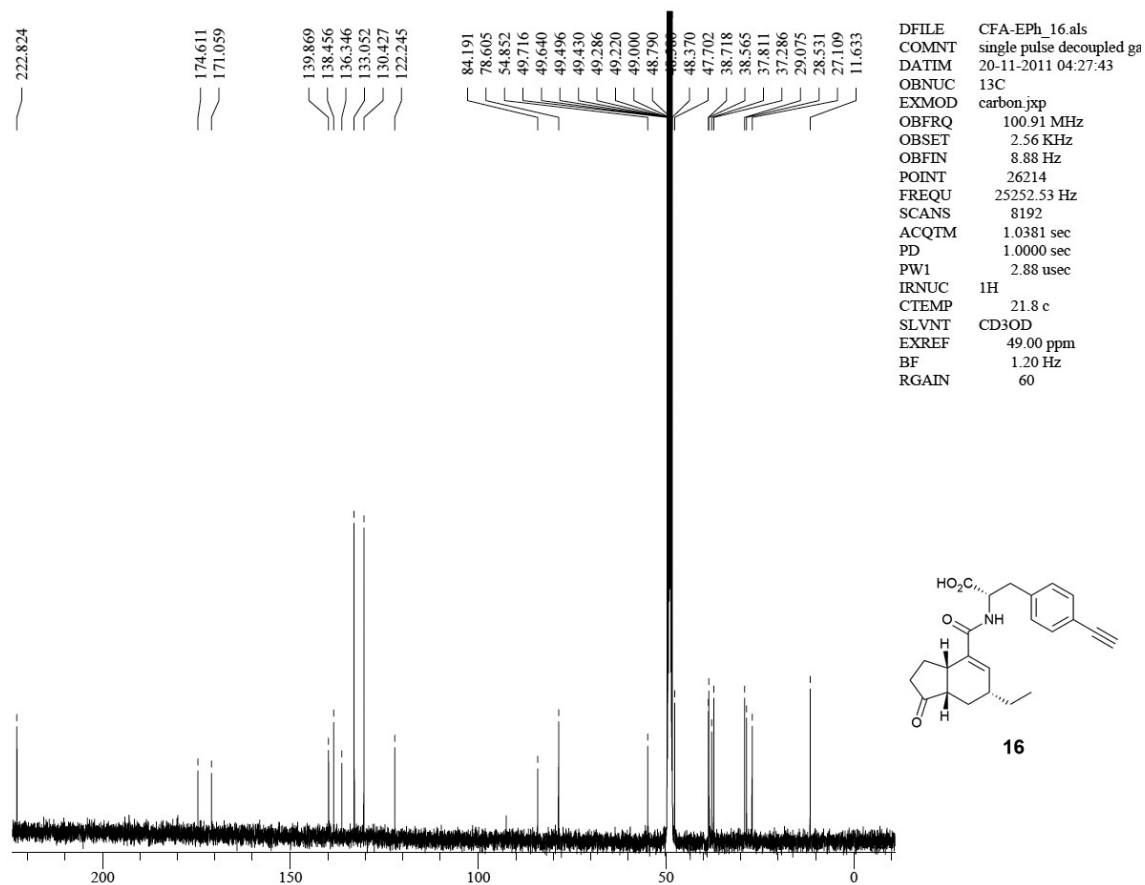

Supplement: c5ra20676f1.pdf [file c5ra20676f1.pdf]
